# Supplementary material for: Spatiotemporal patterns of the COVID-19 epidemic in Mexico at the municipality level
Source: PeerJ journal article supplement (doi:10.7717/peerj.12685), 2021-12-24
Supplement: SM_default.pdf [file SM_default.pdf]

# Spatiotemporal patterns of the COVID-19 pandemic in Mexico at the municipality level Supplementary Material

J.F. Mas

These Supplementary Materials contain maps of population density, weekly new cases number and clusters with associated their relative risk.

## Contents

|          |                                                                                |           |
|----------|--------------------------------------------------------------------------------|-----------|
| <b>1</b> | <b>Map of population density</b>                                               | <b>2</b>  |
| <b>2</b> | <b>Maps of weekly new cases and clusters</b>                                   | <b>3</b>  |
| <b>3</b> | <b>Effect of the different types of distance on neighbouring relationships</b> | <b>7</b>  |
| <b>4</b> | <b>AUCs obtained by the different types of distance</b>                        | <b>12</b> |
| <b>5</b> | <b>AUCs obtained by the different types of distance over time</b>              | <b>15</b> |
| <b>6</b> | <b>Equivalence between week number and dates</b>                               | <b>19</b> |

# 1 Map of population density

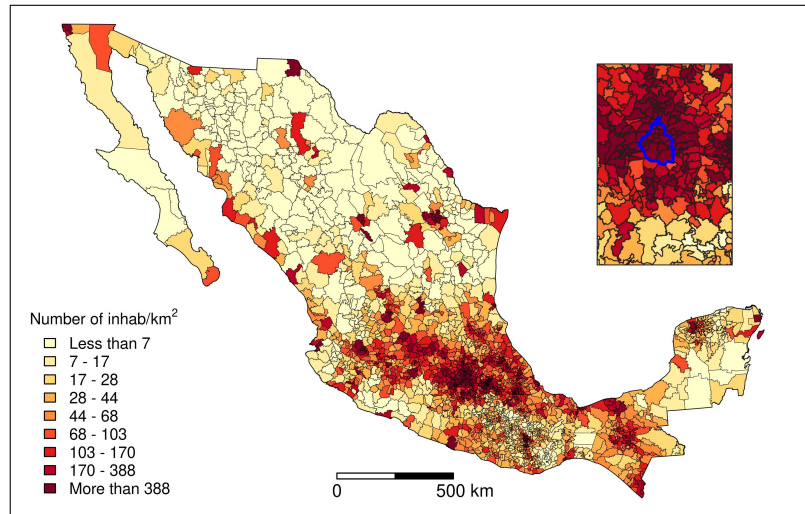

## 2 Maps of weekly new cases and clusters

Cases week 9 (2020-02-23 to 2020-02-29)

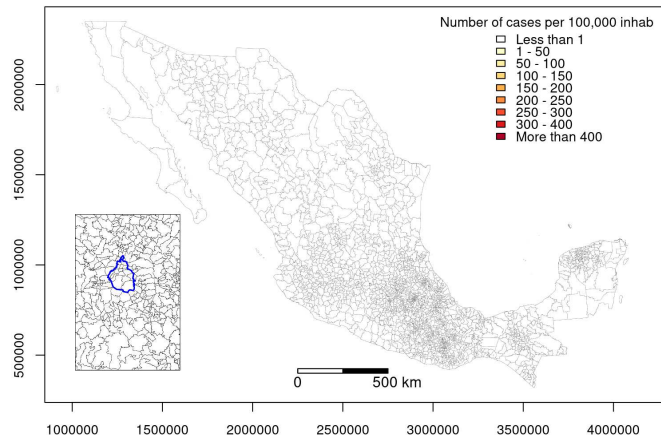

RR week 9 (2020-02-23 to 2020-02-29)

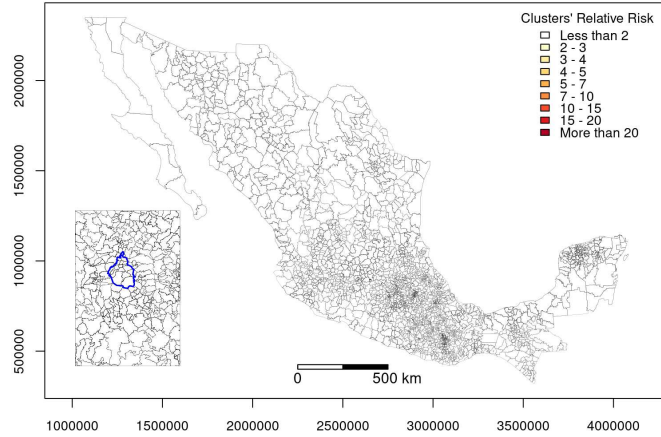

**Cases week 10 (2020-03-01 to 2020-03-07)**

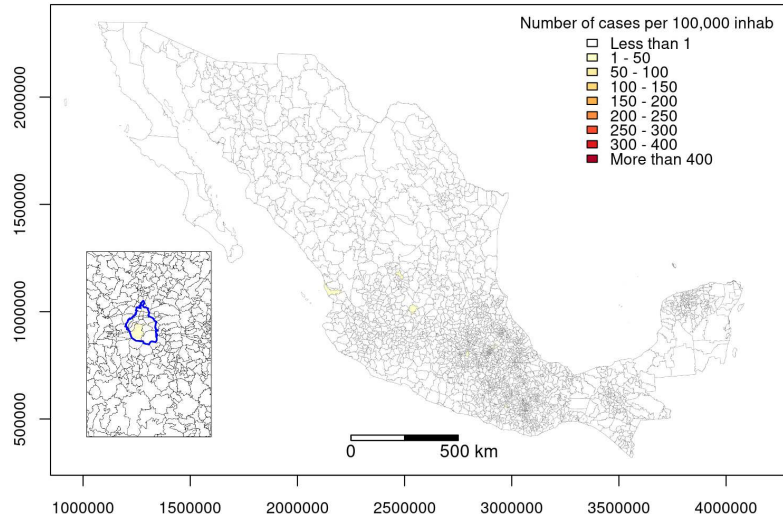

**RR week 10 (2020-03-01 to 2020-03-07)**

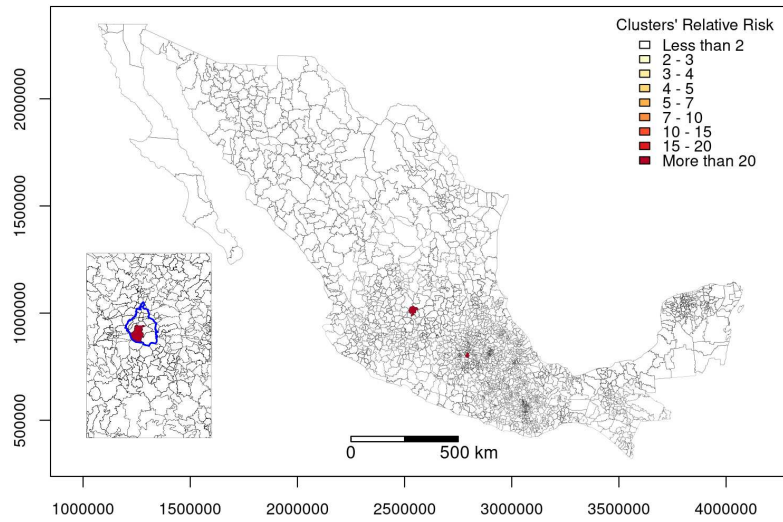



**Cases week 12 (2020-03-15 to 2020-03-21)**

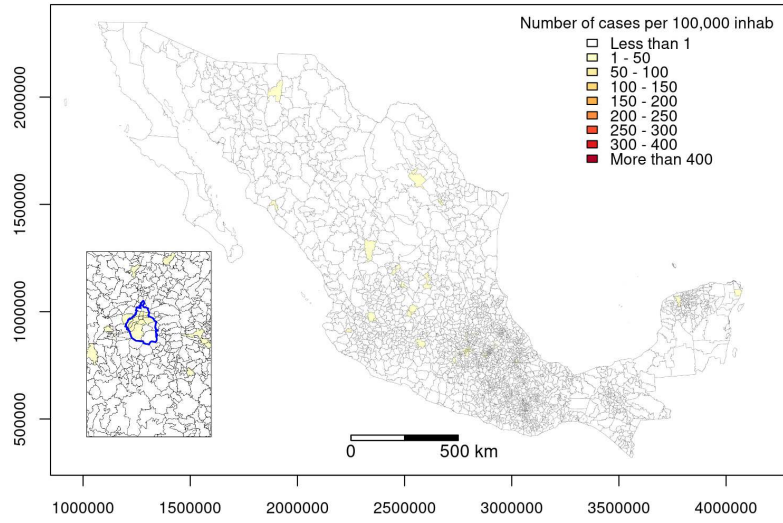

**RR week 12 (2020-03-15 to 2020-03-21)**

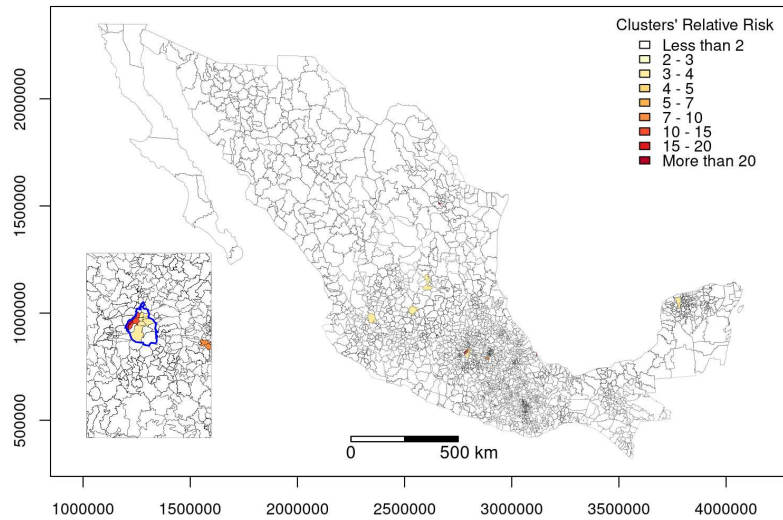

**Cases week 14 (2020-03-29 to 2020-04-04)**

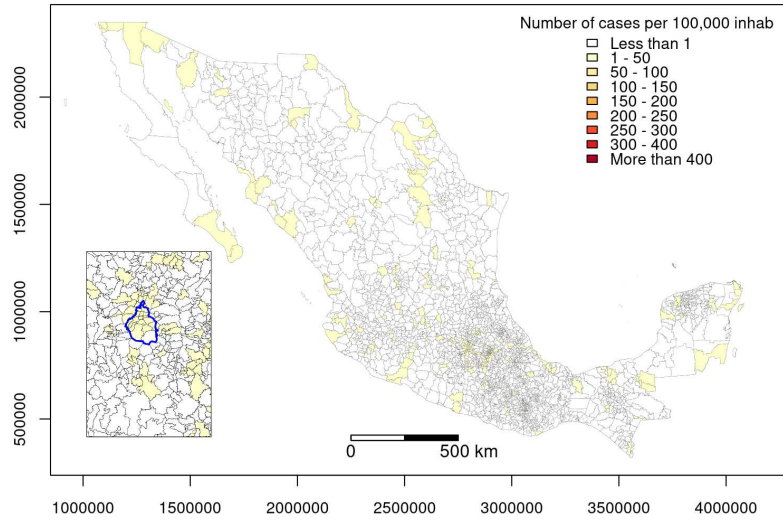

**RR week 14 (2020-03-29 to 2020-04-04)**

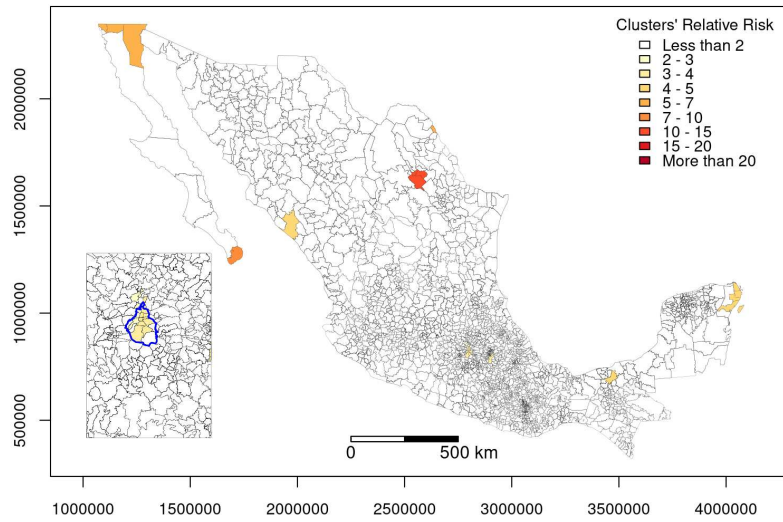

**Cases week 16 (2020-04-12 to 2020-04-18)**

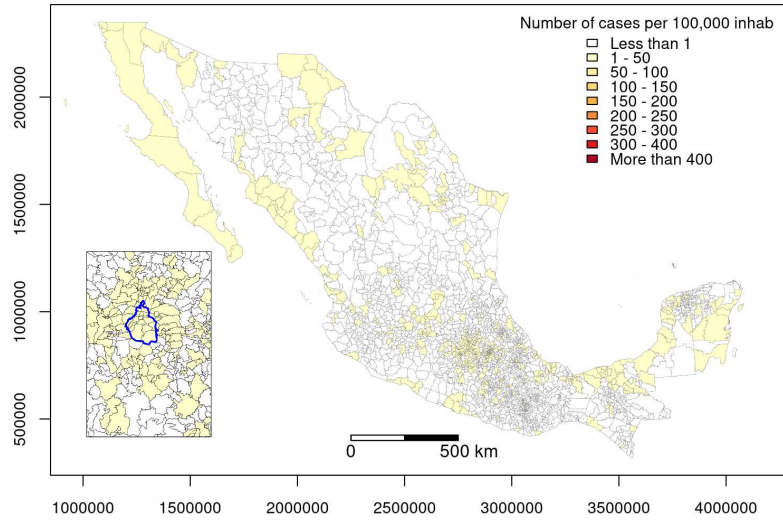

**RR week 16 (2020-04-12 to 2020-04-18)**

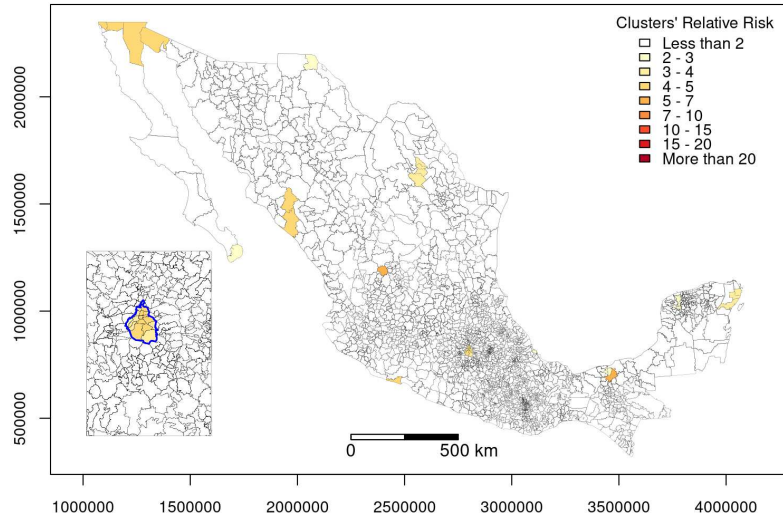

**Cases week 18 (2020-04-26 to 2020-05-02)**

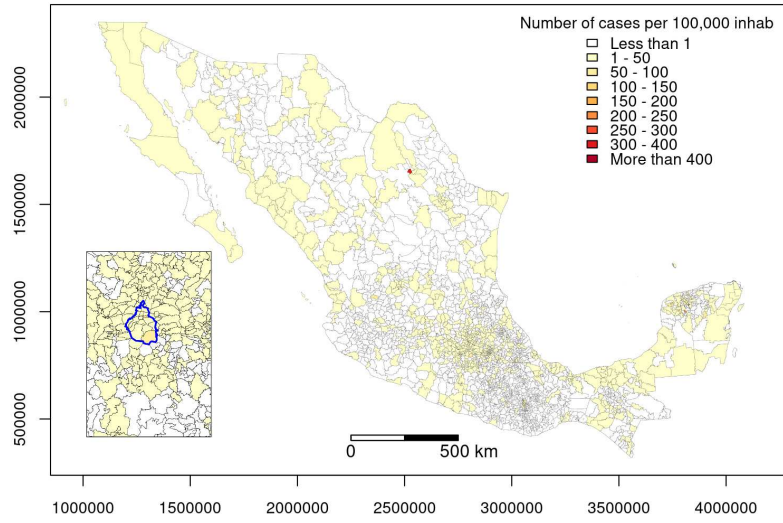

**RR week 18 (2020-04-26 to 2020-05-02)**

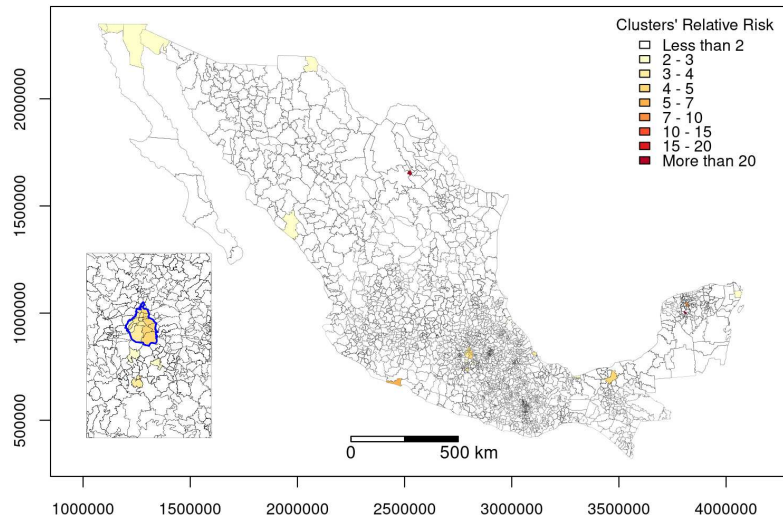

**Cases week 20 (2020-05-10 to 2020-05-16)**

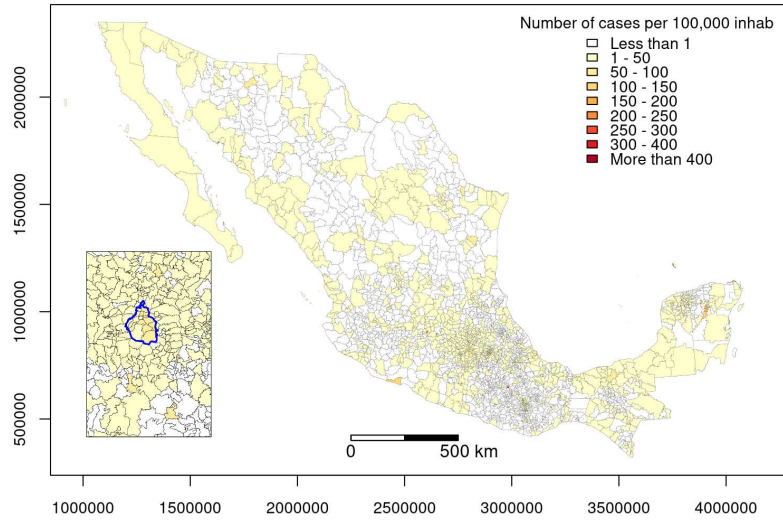

**RR week 20 (2020-05-10 to 2020-05-16)**

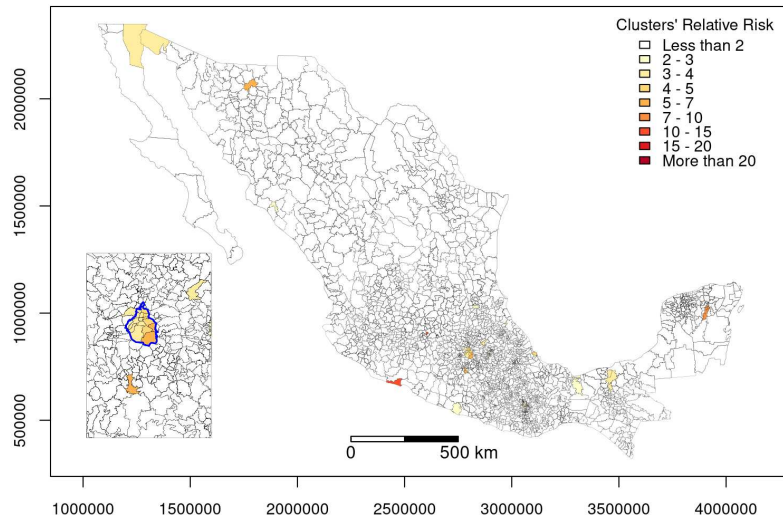

**Cases week 22 (2020-05-24 to 2020-05-30)**

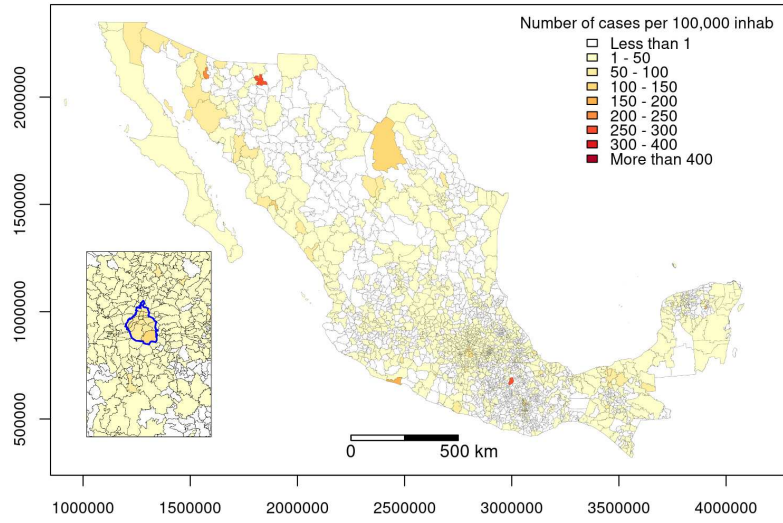

**RR week 22 (2020-05-24 to 2020-05-30)**

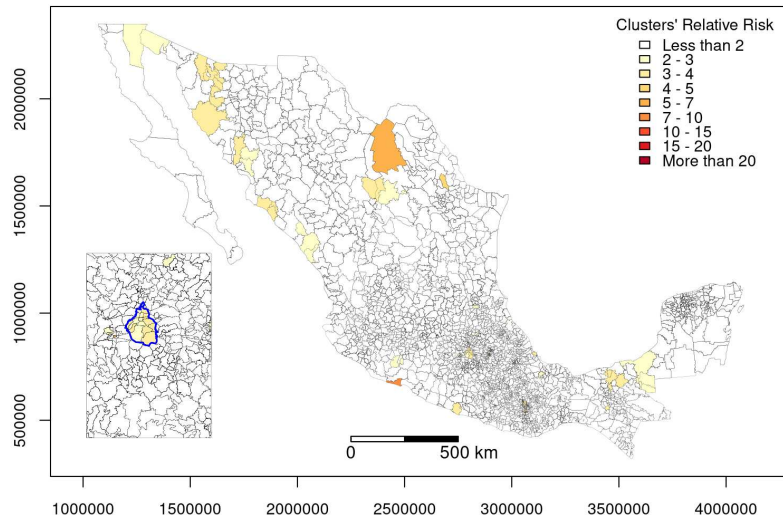



**Cases week 24 (2020-06-07 to 2020-06-13)**

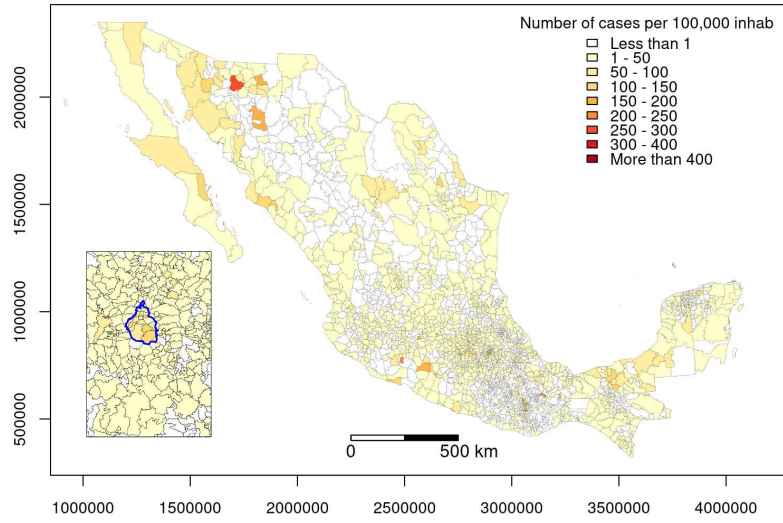

**RR week 24 (2020-06-07 to 2020-06-13)**

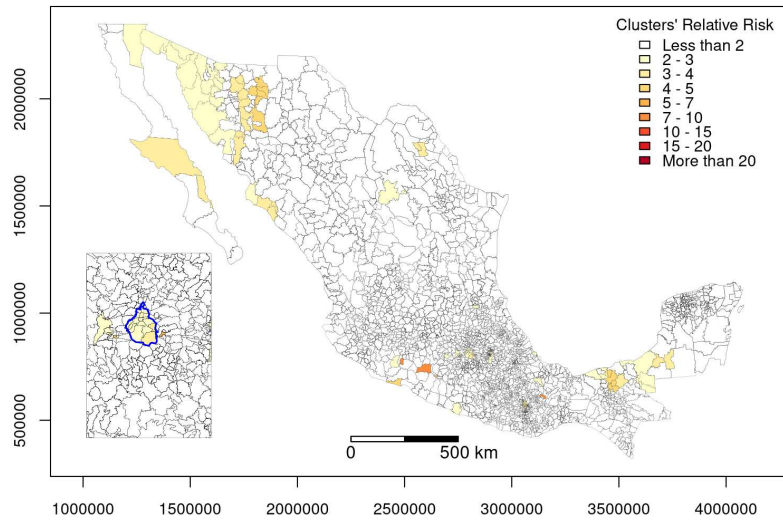

**Cases week 26 (2020-06-21 to 2020-06-27)**

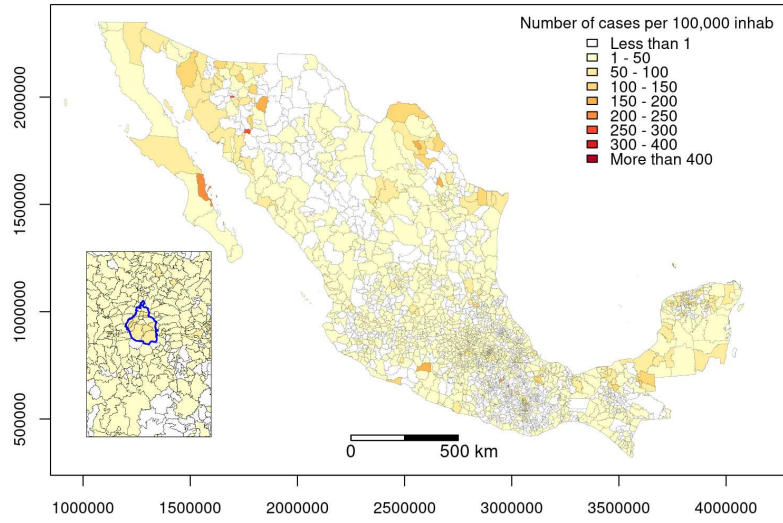

**RR week 26 (2020-06-21 to 2020-06-27)**

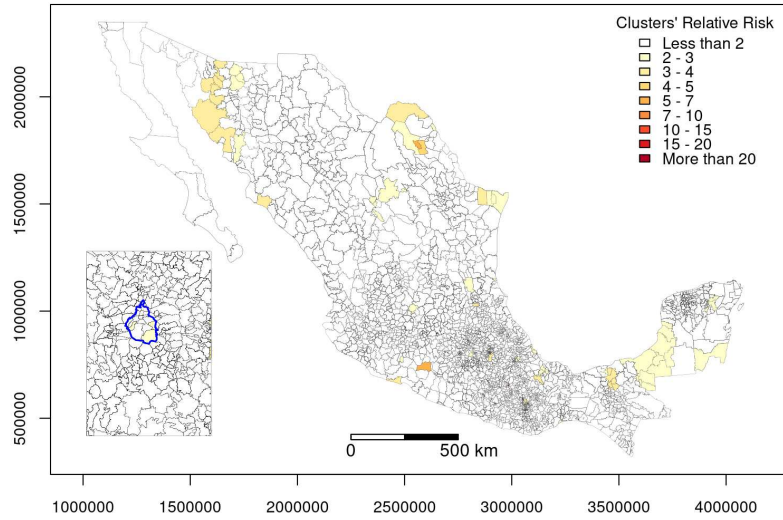



**Cases week 28 (2020-07-05 to 2020-07-11)**

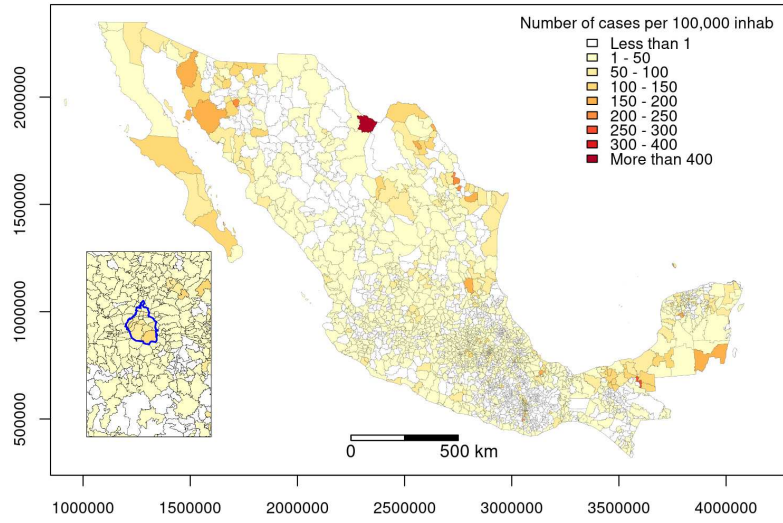

**RR week 28 (2020-07-05 to 2020-07-11)**

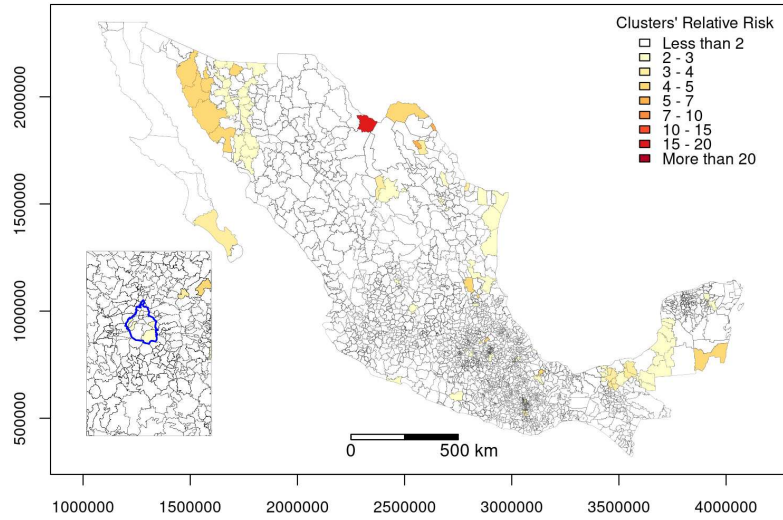

**Cases week 30 (2020-07-19 to 2020-07-25)**

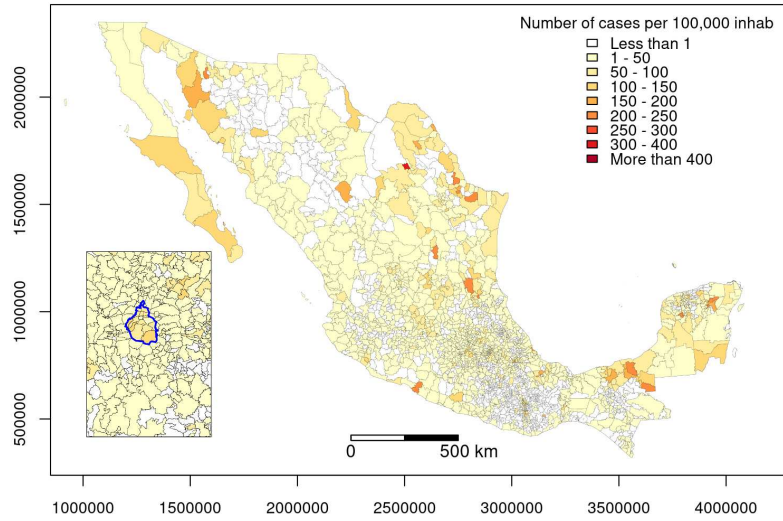

**RR week 30 (2020-07-19 to 2020-07-25)**

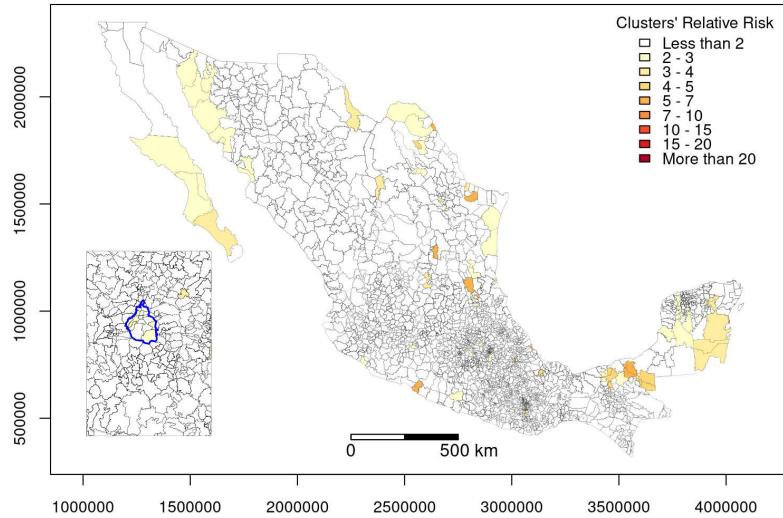

**Cases week 32 (2020-08-02 to 2020-08-08)**

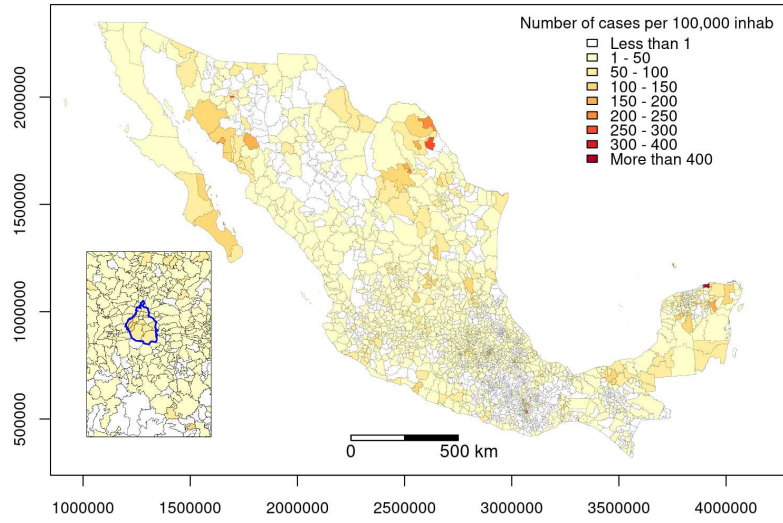

**RR week 32 (2020-08-02 to 2020-08-08)**

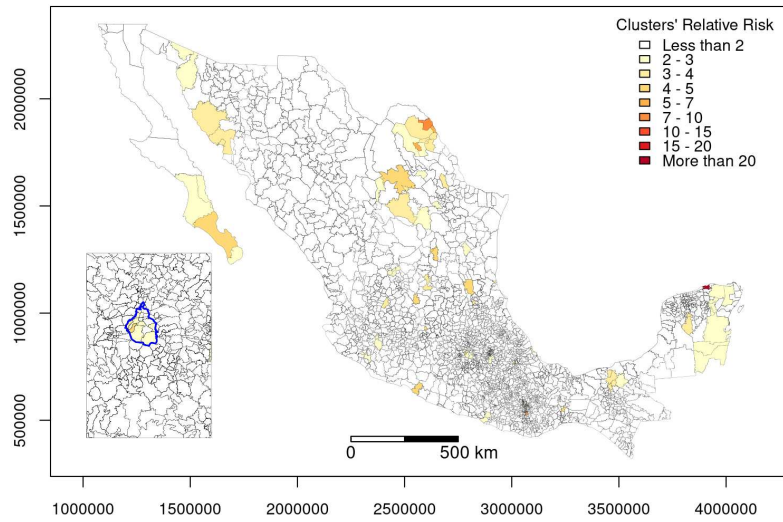

**Cases week 34 (2020-08-16 to 2020-08-22)**

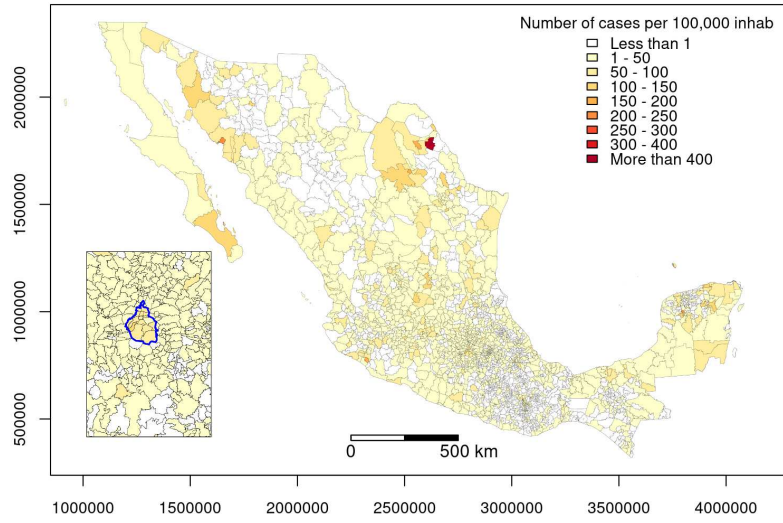

**RR week 34 (2020-08-16 to 2020-08-22)**

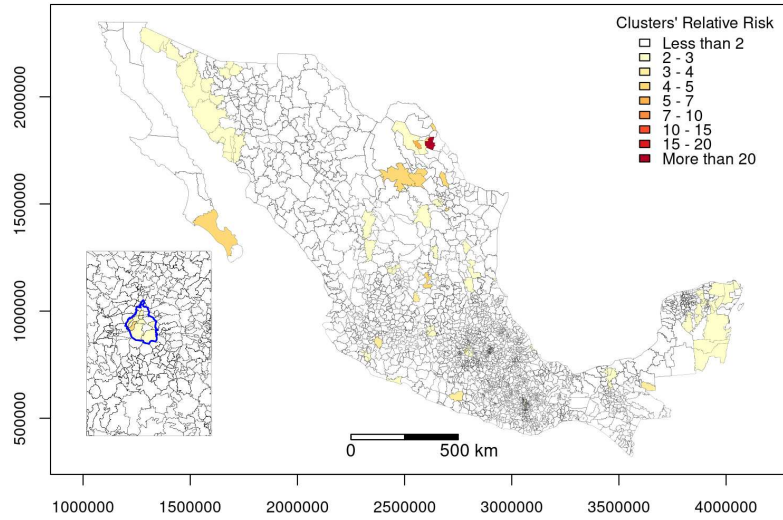

**Cases week 36 (2020-08-30 to 2020-09-05)**

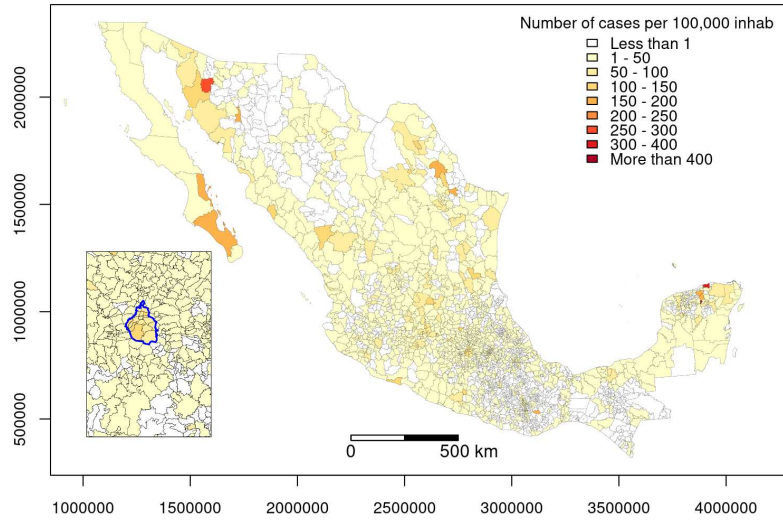

**RR week 36 (2020-08-30 to 2020-09-05)**

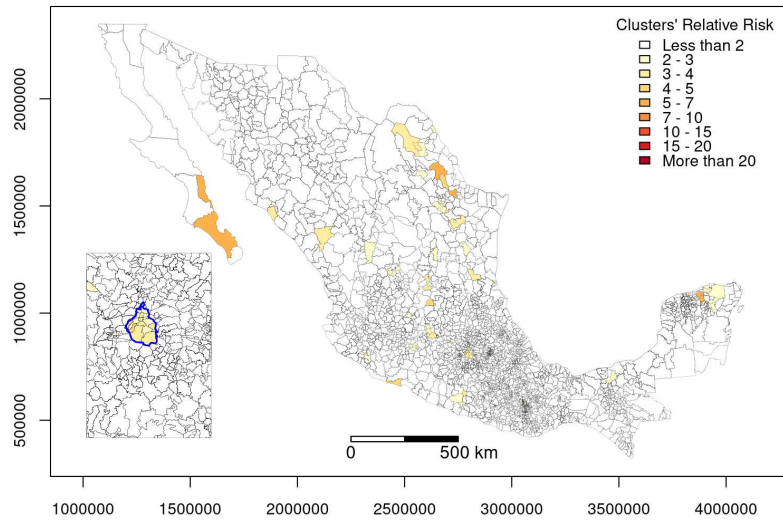

**Cases week 38 (2020-09-13 to 2020-09-19)**

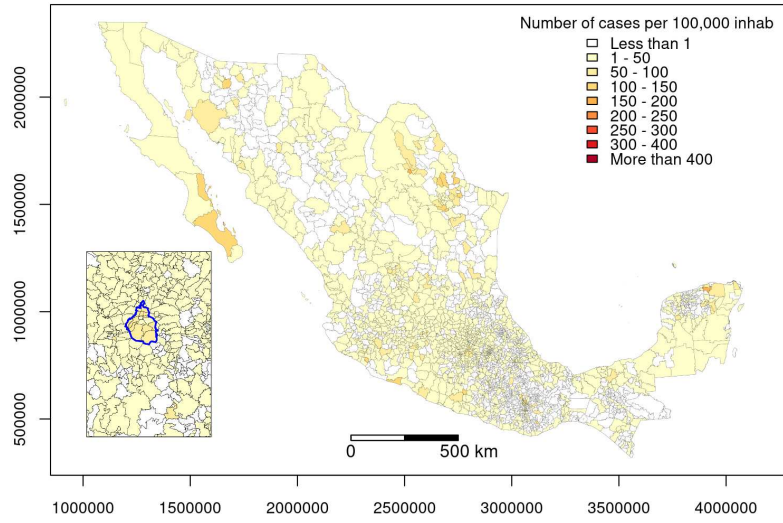

**RR week 38 (2020-09-13 to 2020-09-19)**

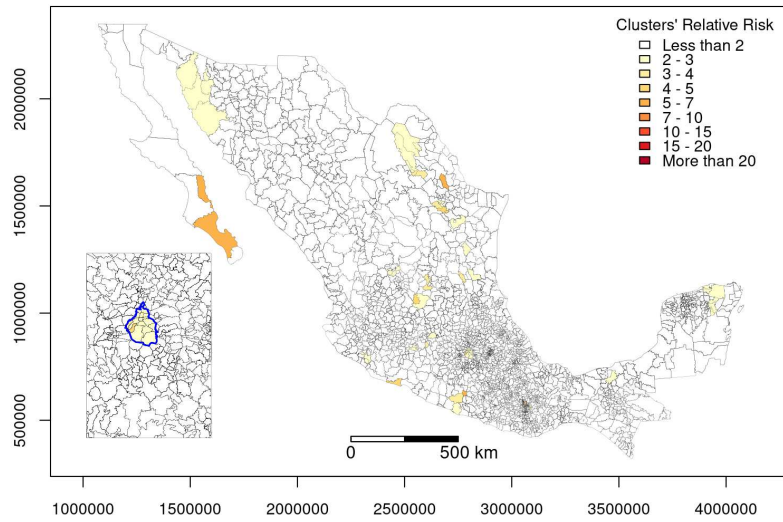



**Cases week 40 (2020-09-27 to 2020-10-03)**

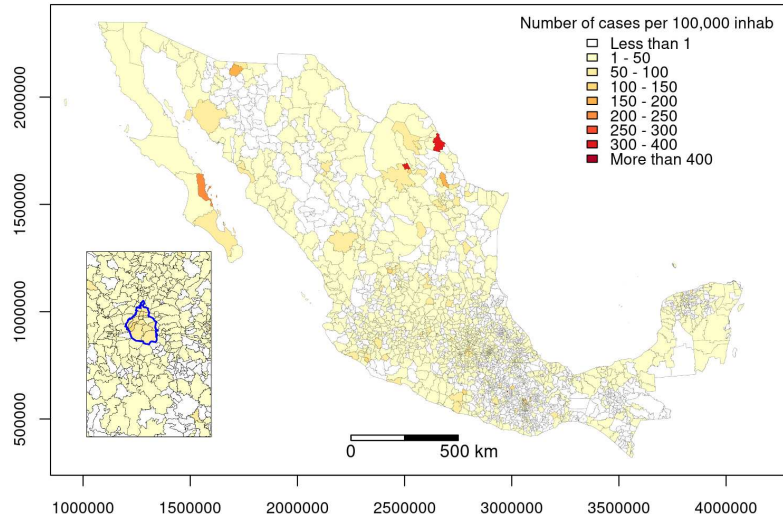

**RR week 40 (2020-09-27 to 2020-10-03)**

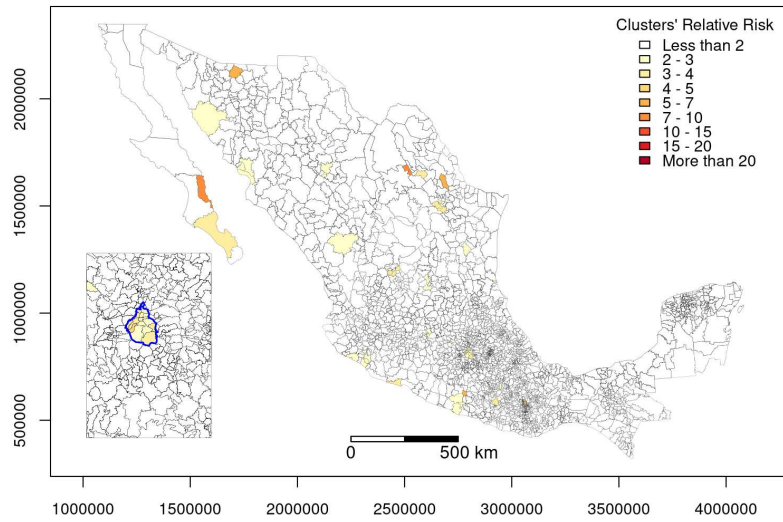

**Cases week 42 (2020-10-11 to 2020-10-17)**

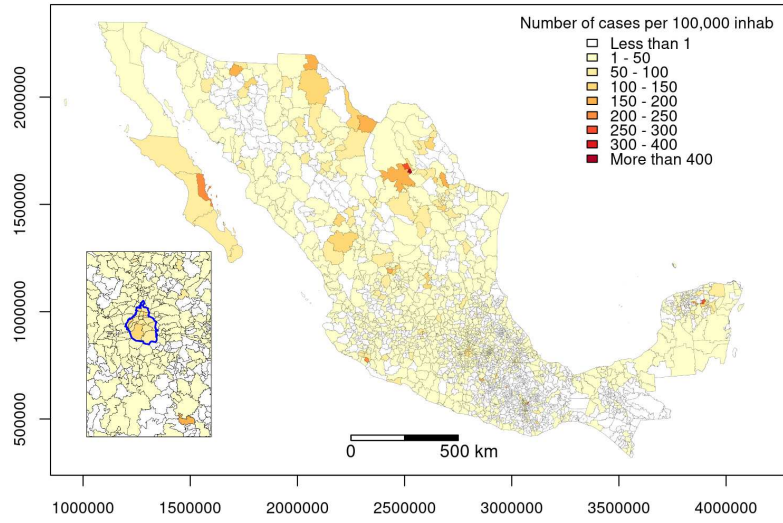

**RR week 42 (2020-10-11 to 2020-10-17)**

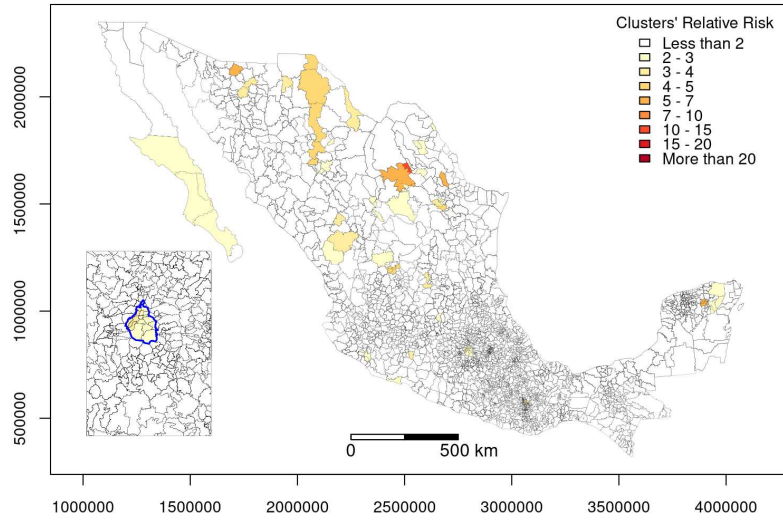



**Cases week 44 (2020-10-25 to 2020-10-31)**

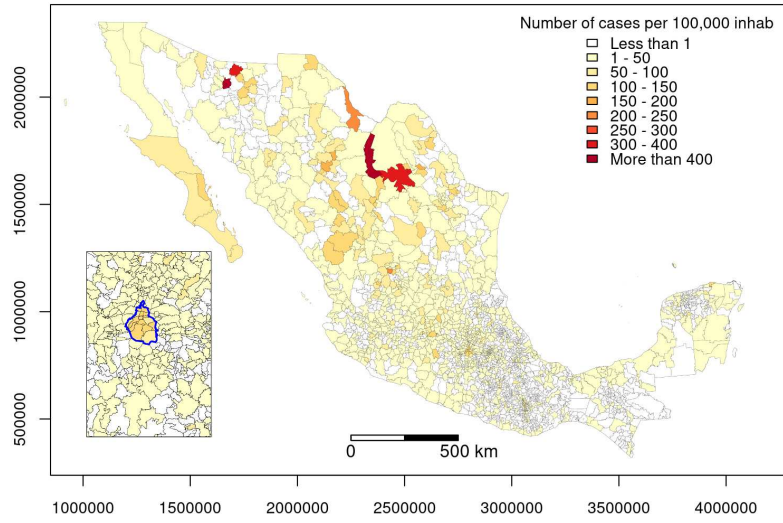

**RR week 44 (2020-10-25 to 2020-10-31)**

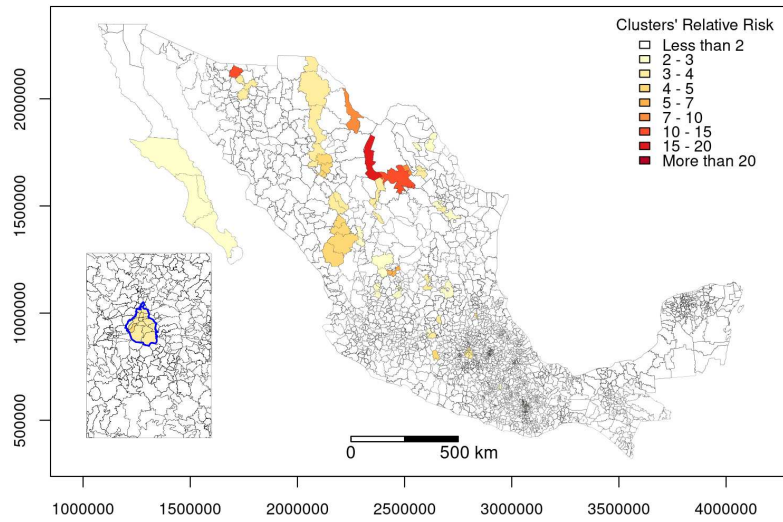

**Cases week 46 (2020-11-08 to 2020-11-14)**

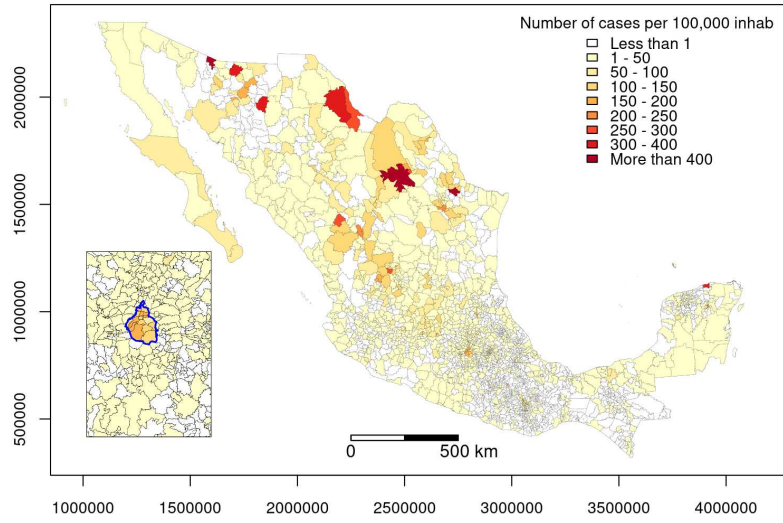

**RR week 46 (2020-11-08 to 2020-11-14)**

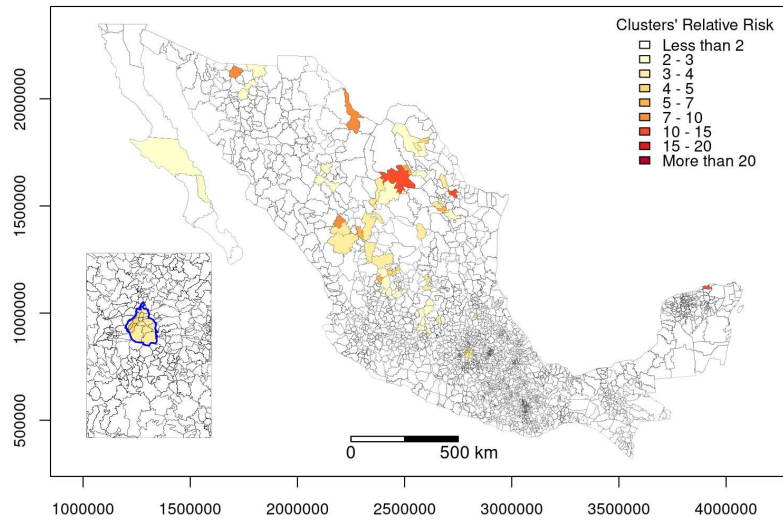

**Cases week 48 (2020-11-22 to 2020-11-28)**

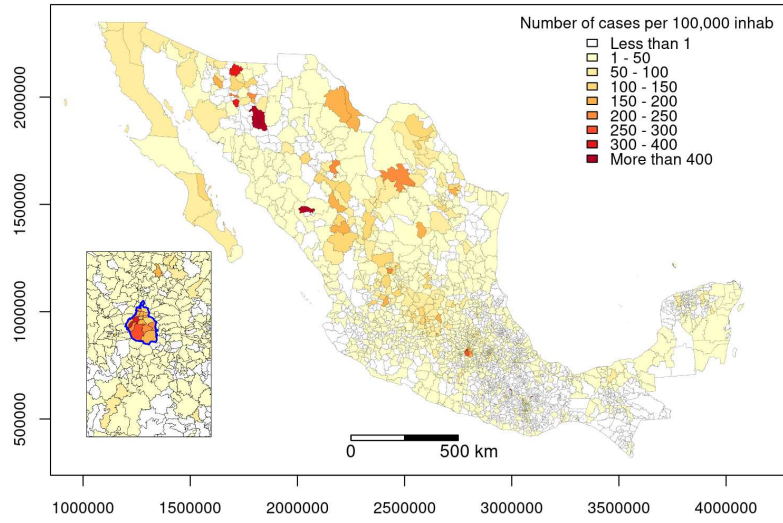

**RR week 48 (2020-11-22 to 2020-11-28)**

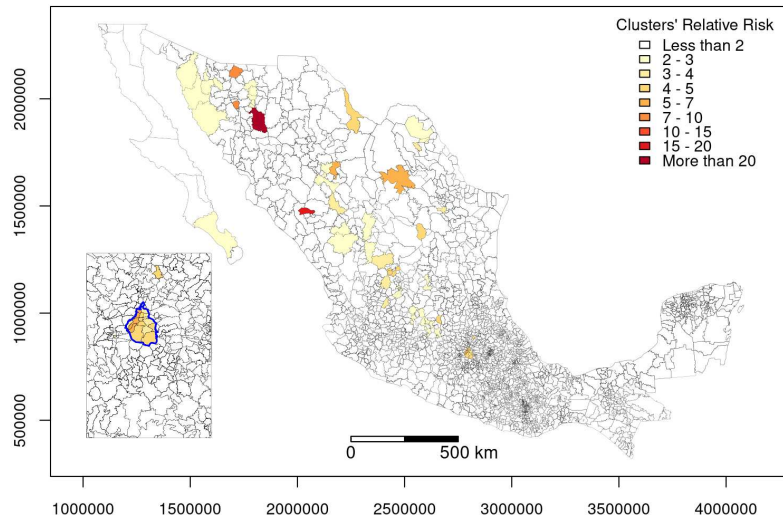

**Cases week 50 (2020-12-06 to 2020-12-12)**

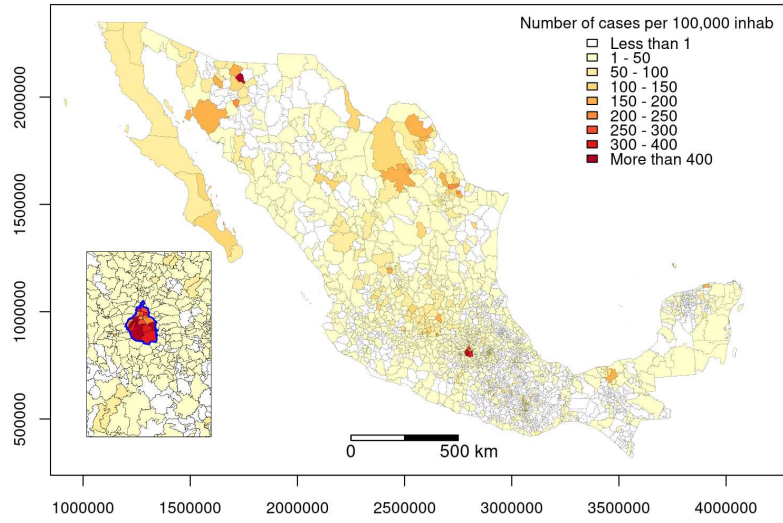

**RR week 50 (2020-12-06 to 2020-12-12)**

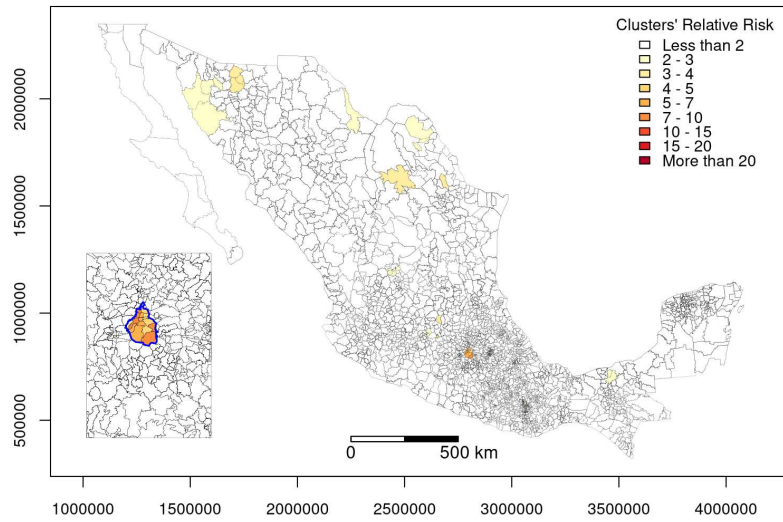

**Cases week 52 (2020-12-20 to 2020-12-26)**

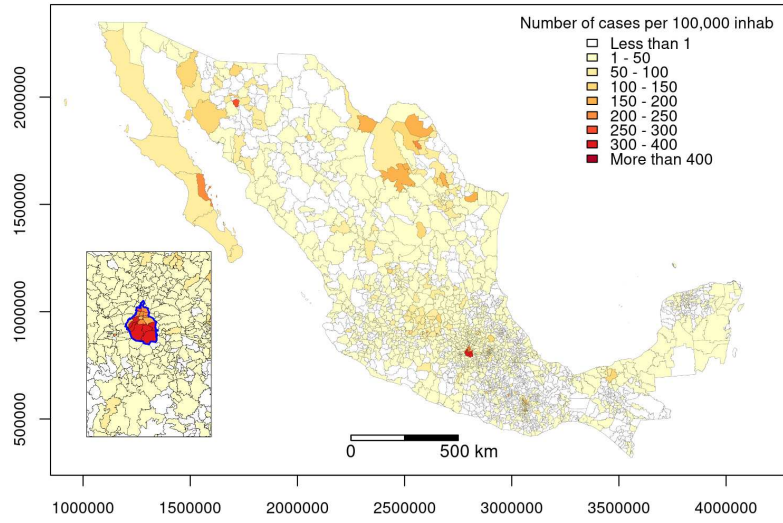

**RR week 52 (2020-12-20 to 2020-12-26)**

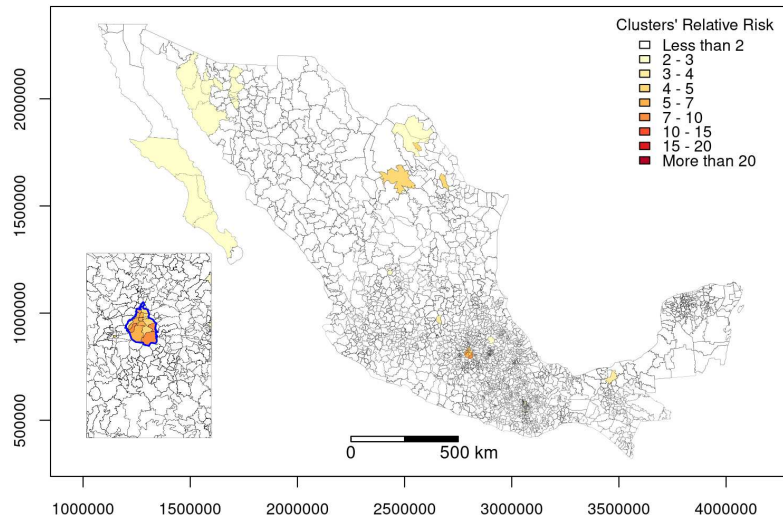

**Cases week 54 (2021-01-03 to 2021-01-09)**

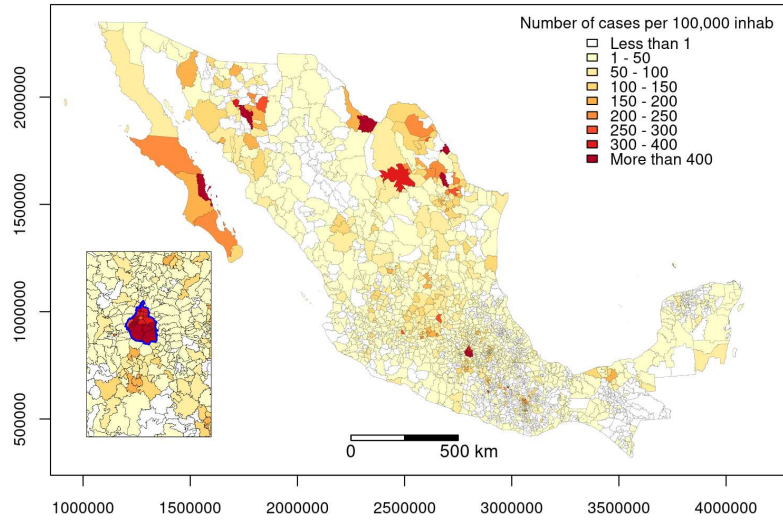

**RR week 54 (2021-01-03 to 2021-01-09)**

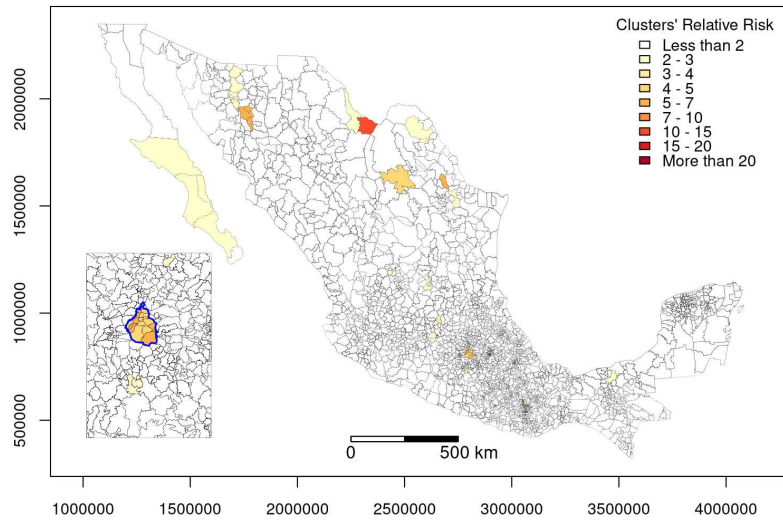



**Cases week 56 (2021-01-17 to 2021-01-23)**

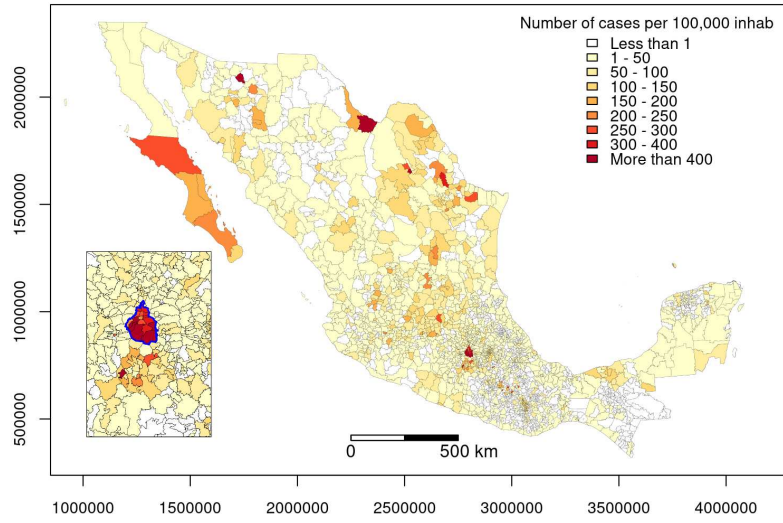

**RR week 56 (2021-01-17 to 2021-01-23)**

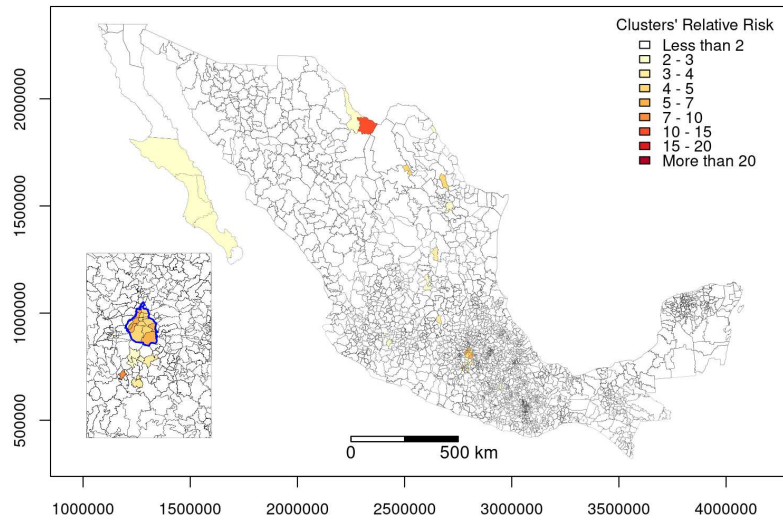

**Cases week 58 (2021-01-31 to 2021-02-06)**

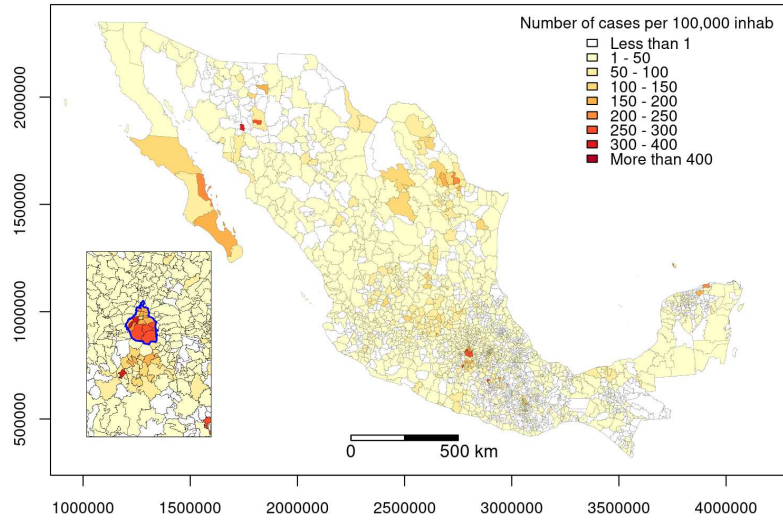

**RR week 58 (2021-01-31 to 2021-02-06)**

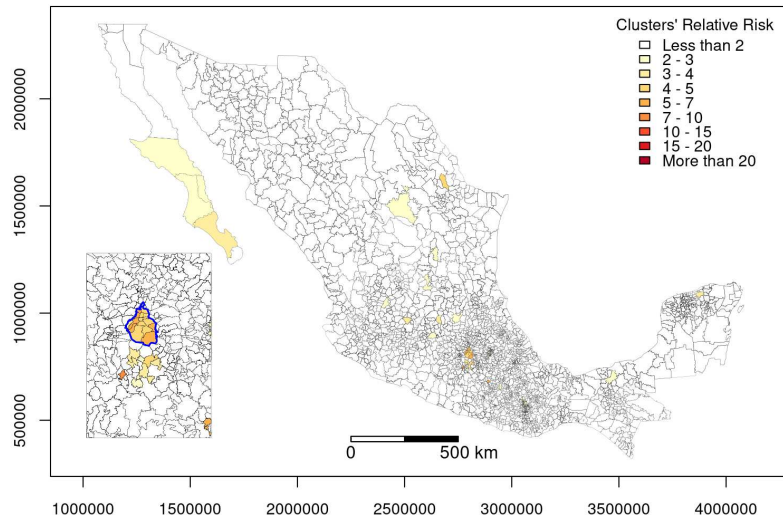



**Cases week 60 (2021-02-14 to 2021-02-20)**

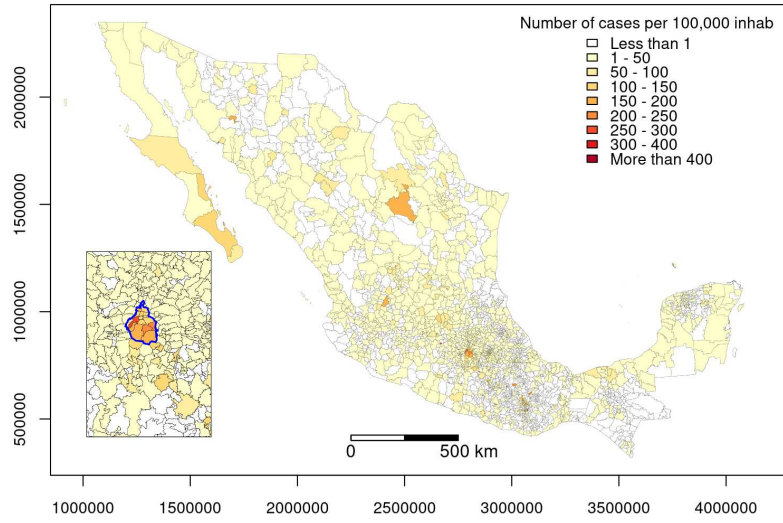

**RR week 60 (2021-02-14 to 2021-02-20)**

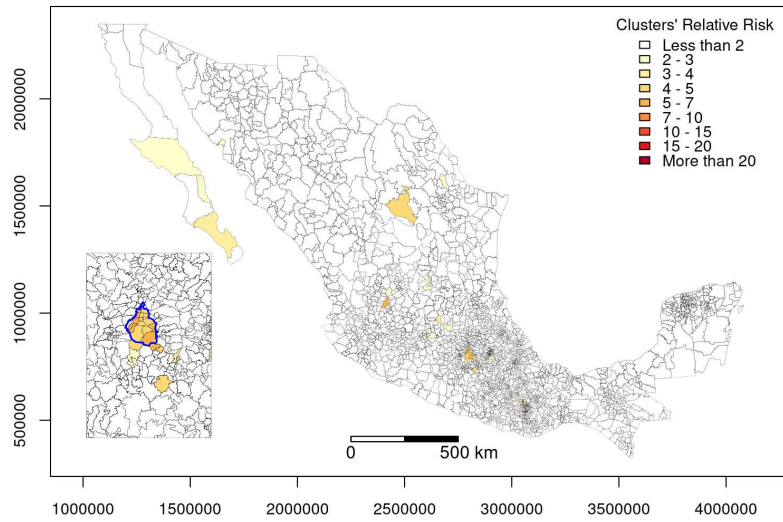

**Cases week 62 (2021-02-28 to 2021-03-06)**

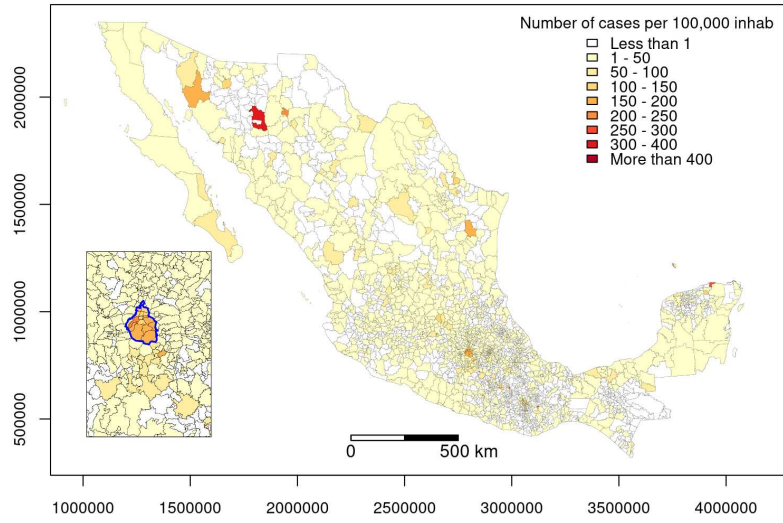

**RR week 62 (2021-02-28 to 2021-03-06)**

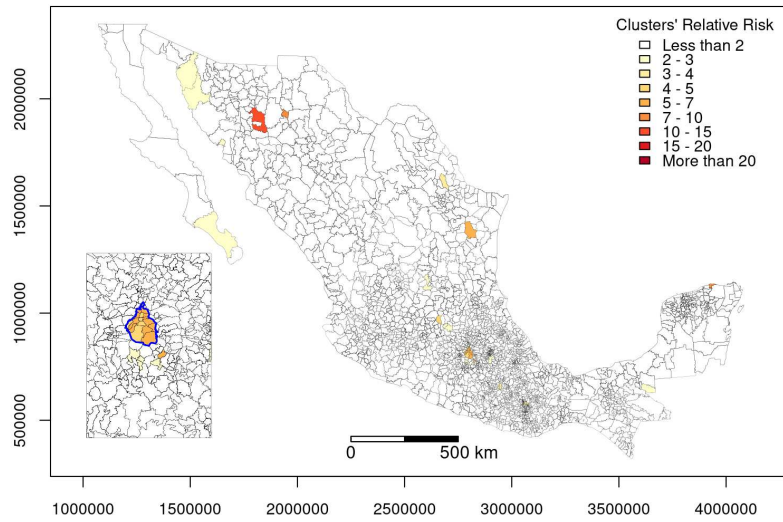

**Cases week 64 (2021-03-14 to 2021-03-20)**

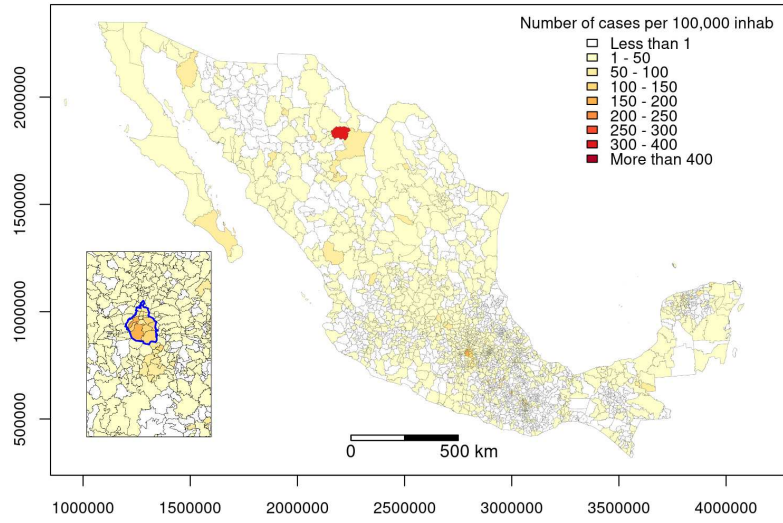

**RR week 64 (2021-03-14 to 2021-03-20)**

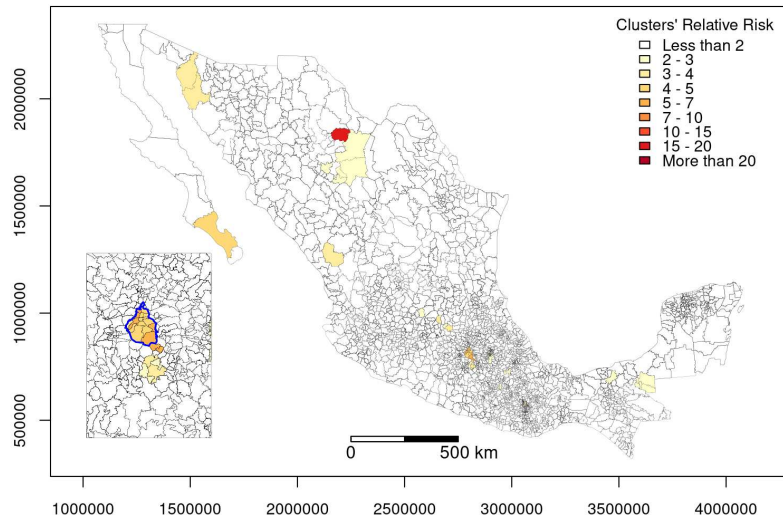

**Cases week 66 (2021-03-28 to 2021-04-03)**

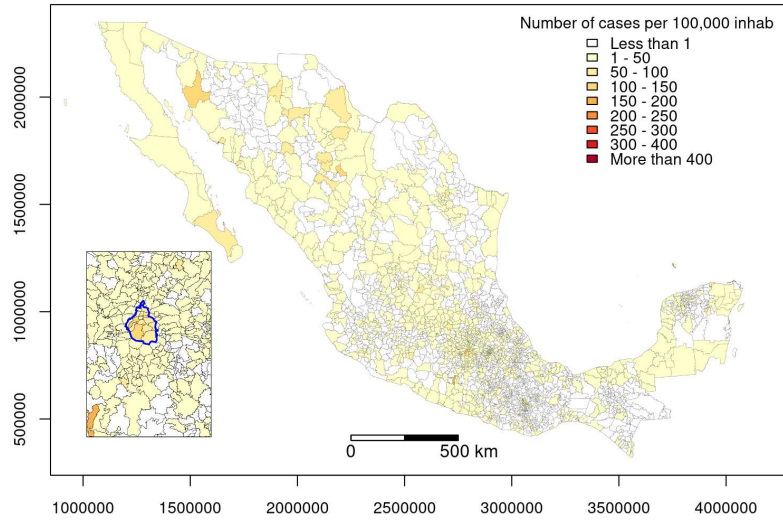

**RR week 66 (2021-03-28 to 2021-04-03)**

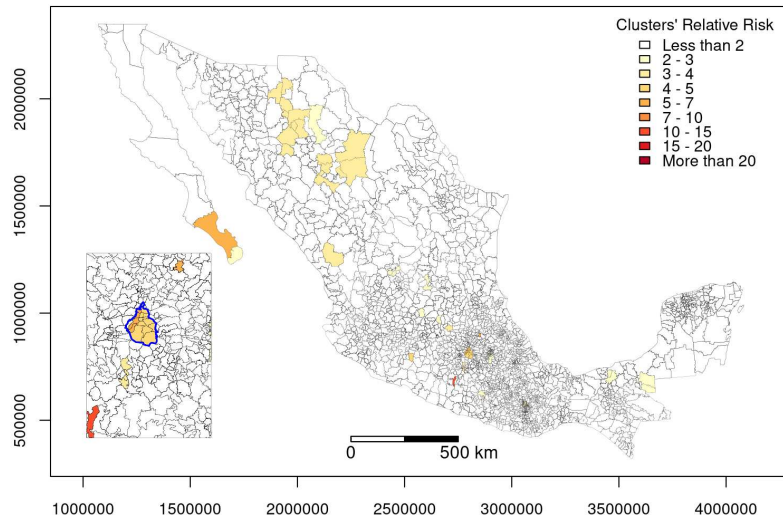

**Cases week 68 (2021-04-11 to 2021-04-17)**

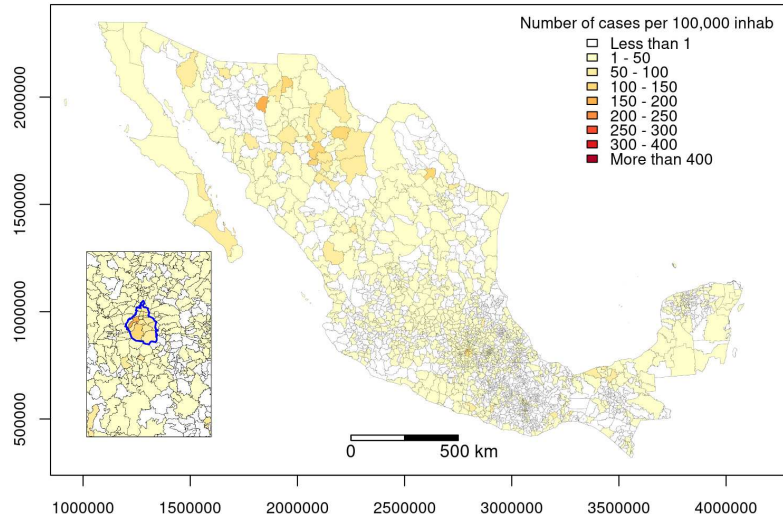

**RR week 68 (2021-04-11 to 2021-04-17)**

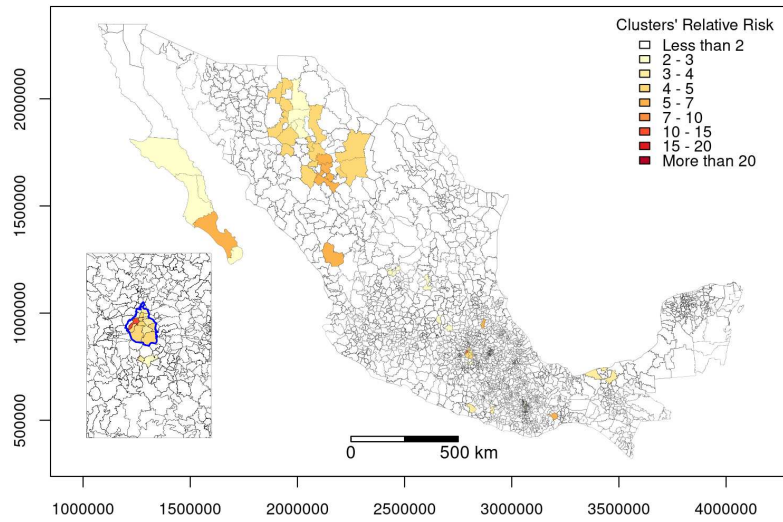

**Cases week 70 (2021-04-25 to 2021-05-01)**

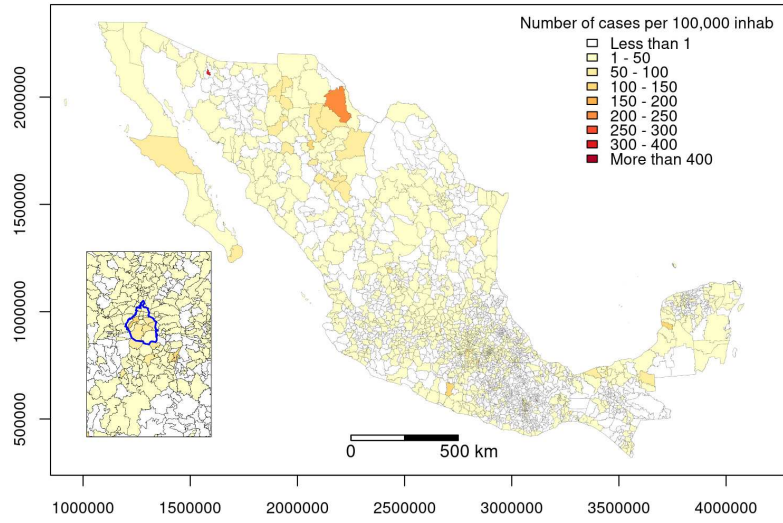

**RR week 70 (2021-04-25 to 2021-05-01)**

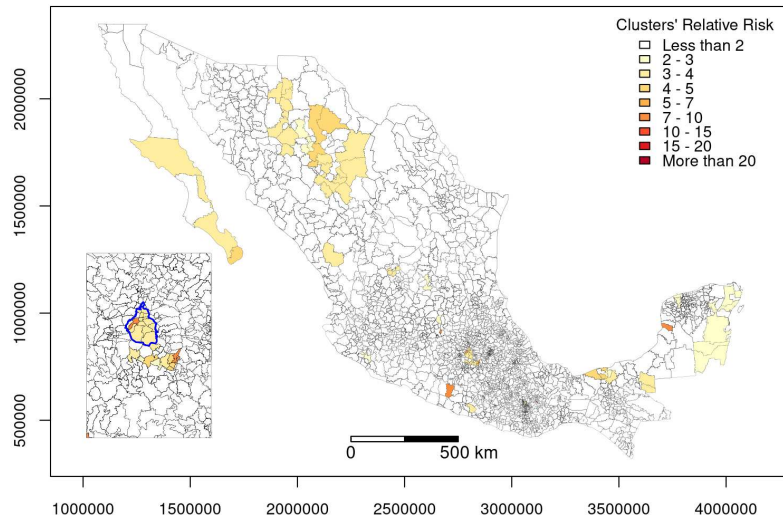



Cases week 72 (2021-05-09 to 2021-05-15)

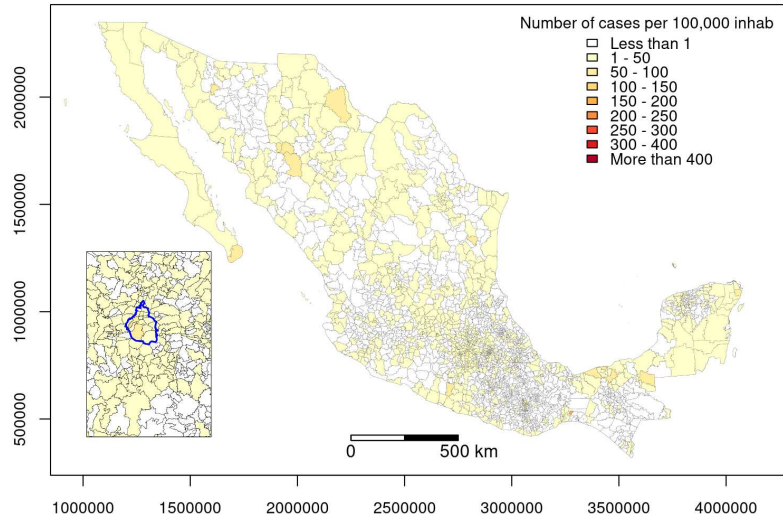

RR week 72 (2021-05-09 to 2021-05-15)

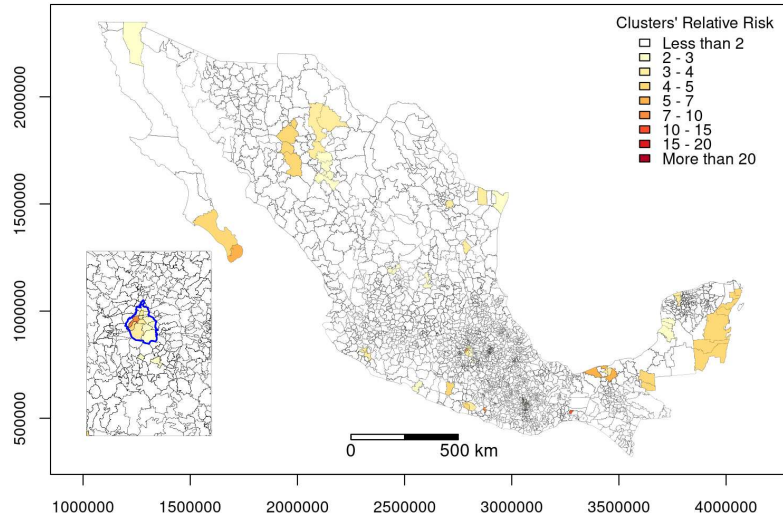

**Cases week 74 (2021-05-23 to 2021-05-29)**

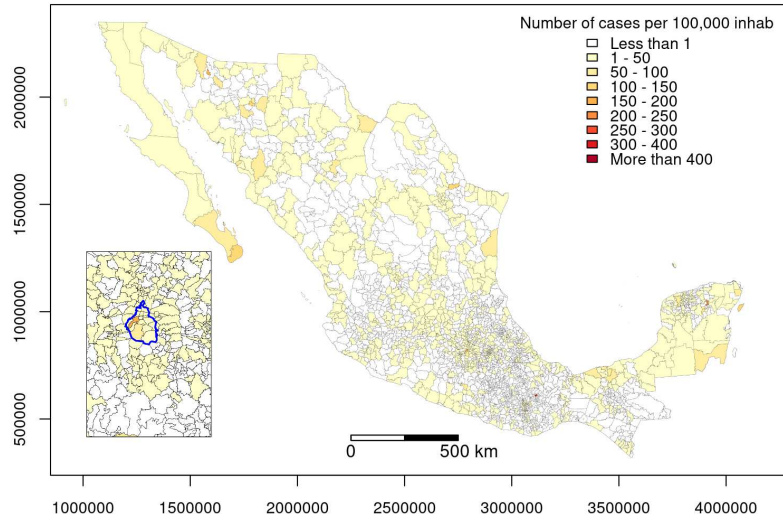

**RR week 74 (2021-05-23 to 2021-05-29)**

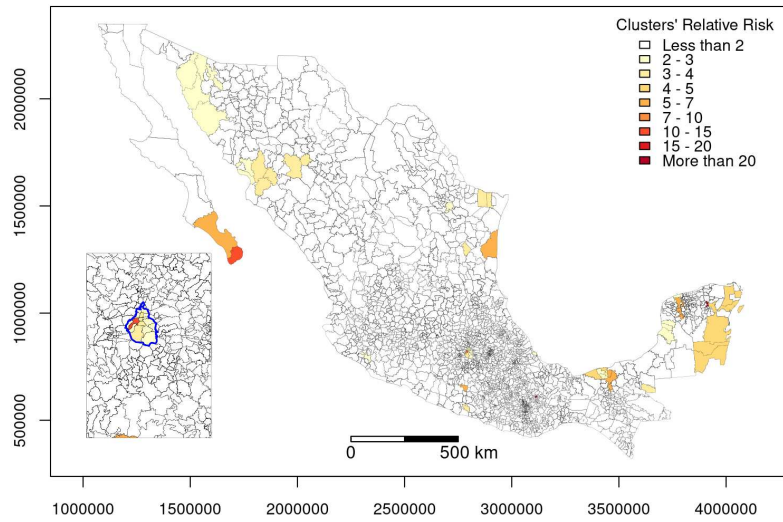



**Cases week 76 (2021-06-06 to 2021-06-12)**

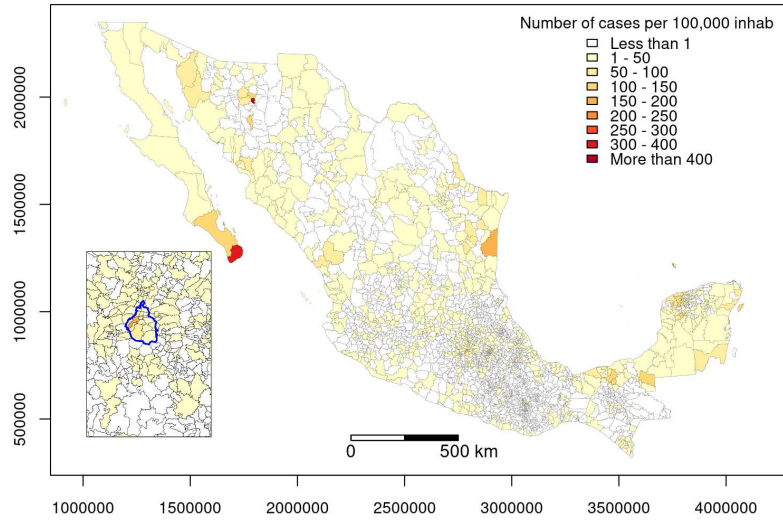

**RR week 76 (2021-06-06 to 2021-06-12)**

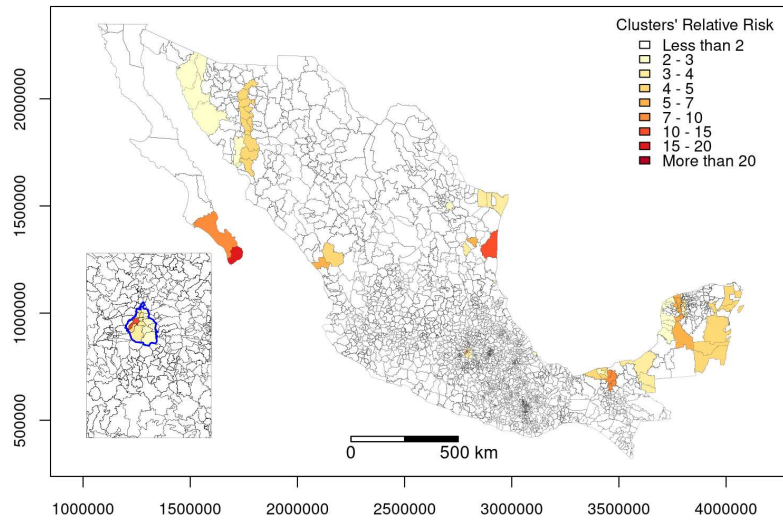

**Cases week 78 (2021-06-20 to 2021-06-26)**

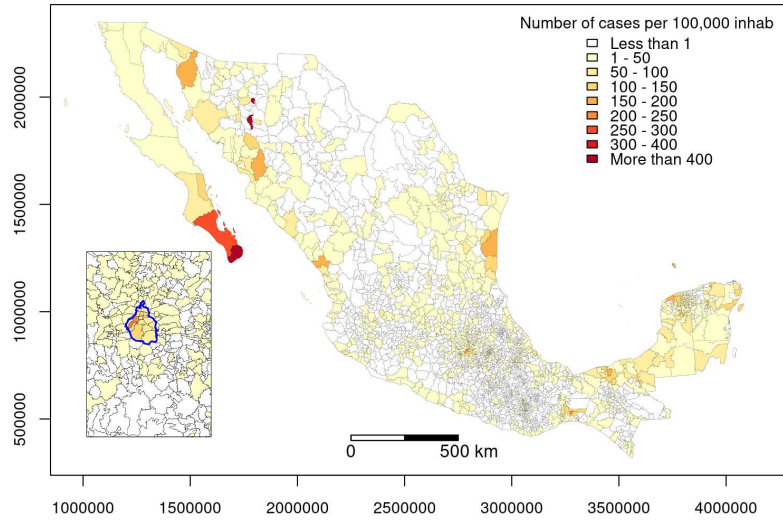

**RR week 78 (2021-06-20 to 2021-06-26)**

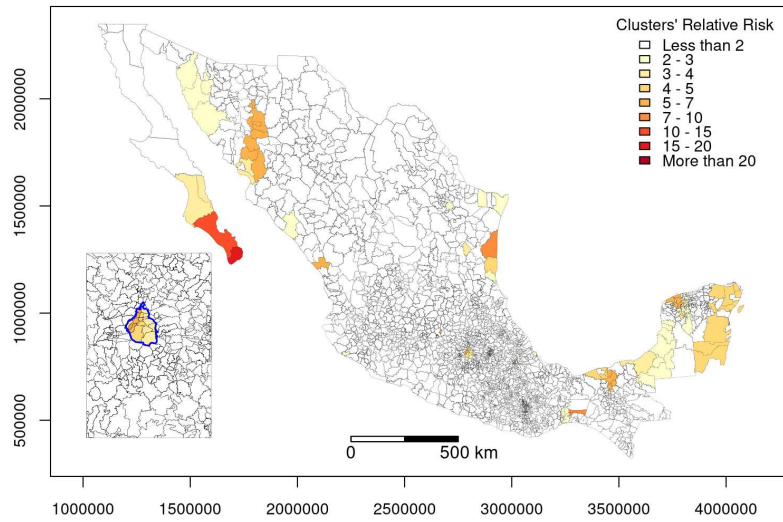

**Cases week 80 (2021-07-04 to 2021-07-10)**

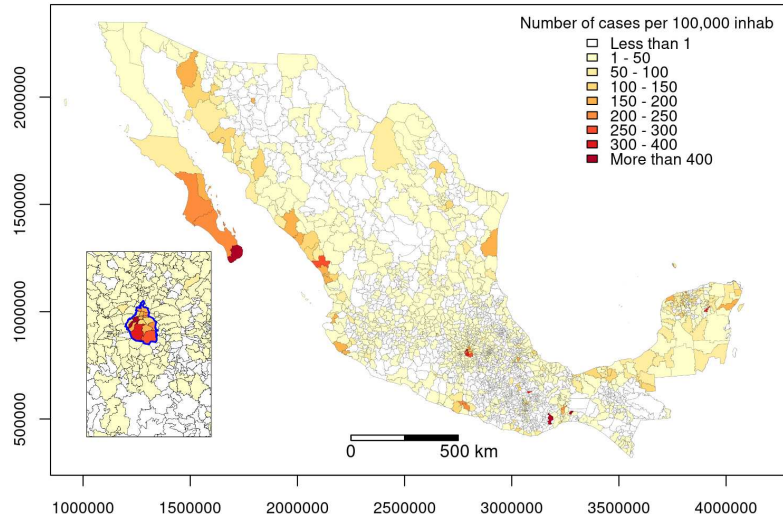

**RR week 80 (2021-07-04 to 2021-07-10)**

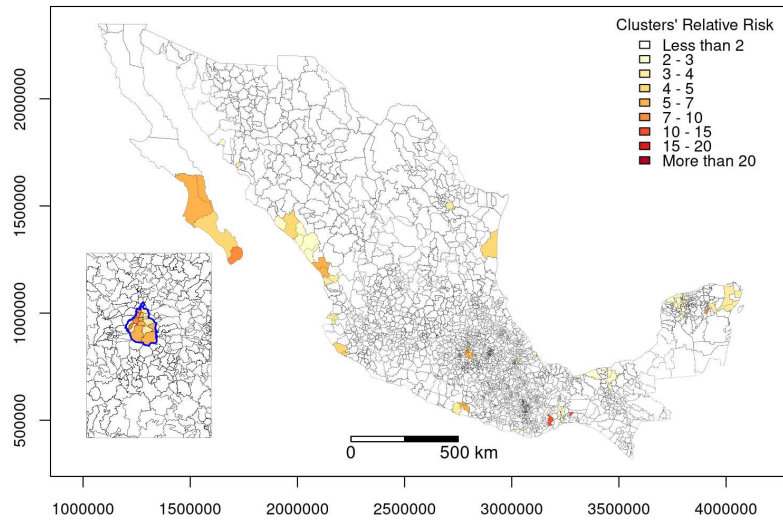

**Cases week 82 (2021-07-18 to 2021-07-24)**

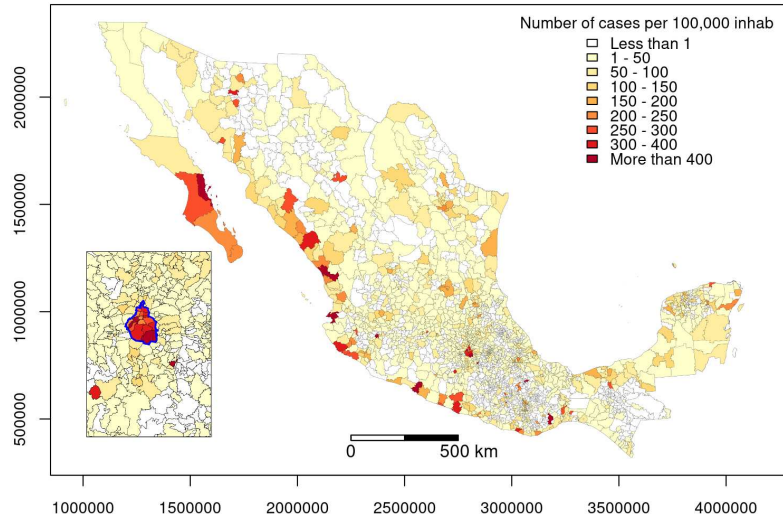

**RR week 82 (2021-07-18 to 2021-07-24)**

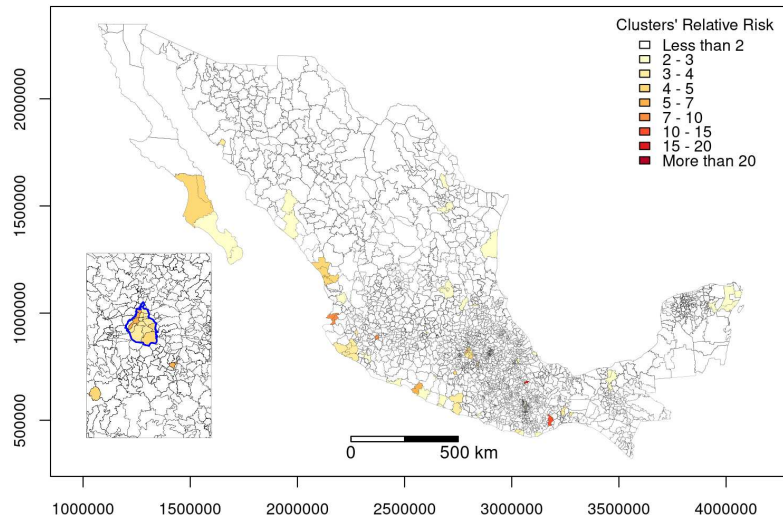

**Cases week 84 (2021-08-01 to 2021-08-07)**

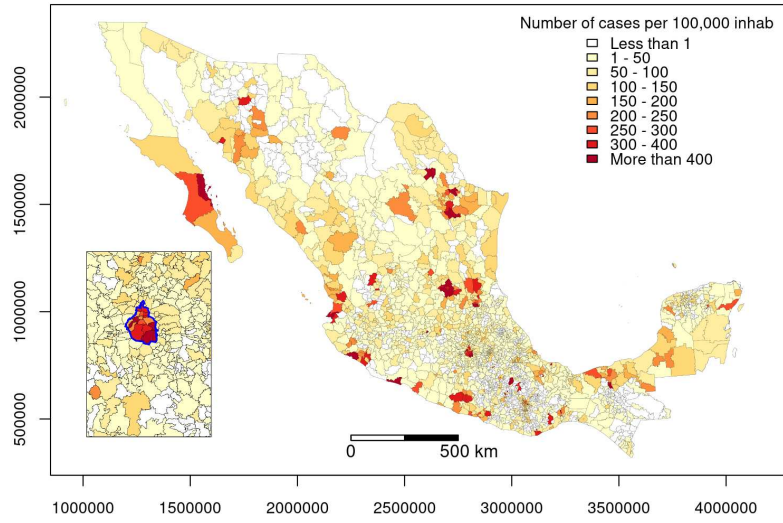

**RR week 84 (2021-08-01 to 2021-08-07)**

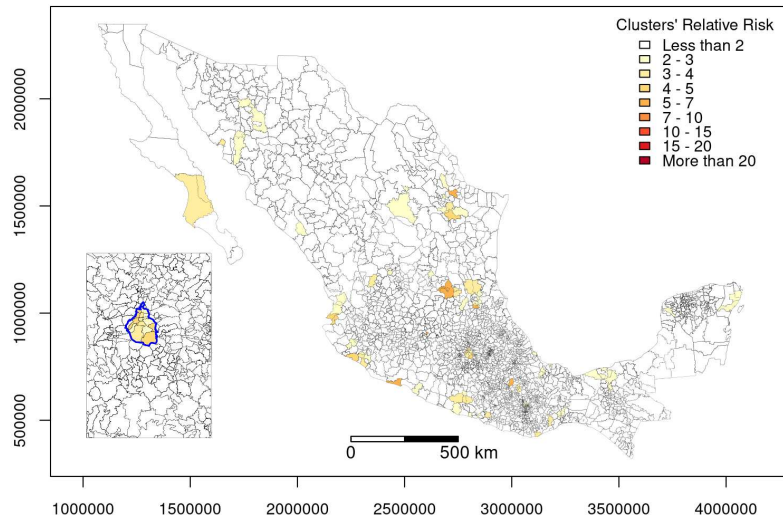

**Cases week 86 (2021-08-15 to 2021-08-21)**

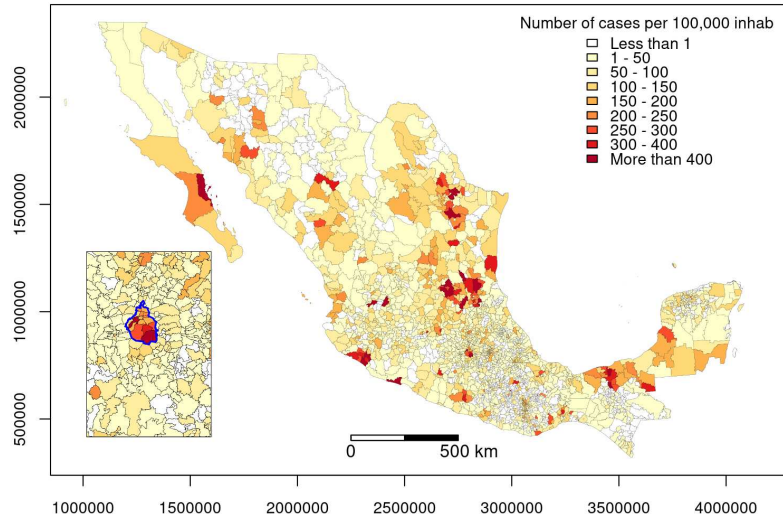

**RR week 86 (2021-08-15 to 2021-08-21)**

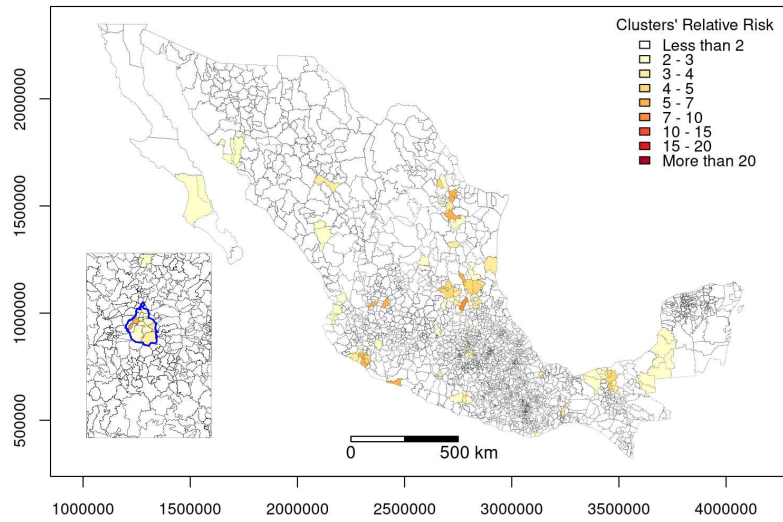



Cases week 88 (2021-08-29 to 2021-09-04)

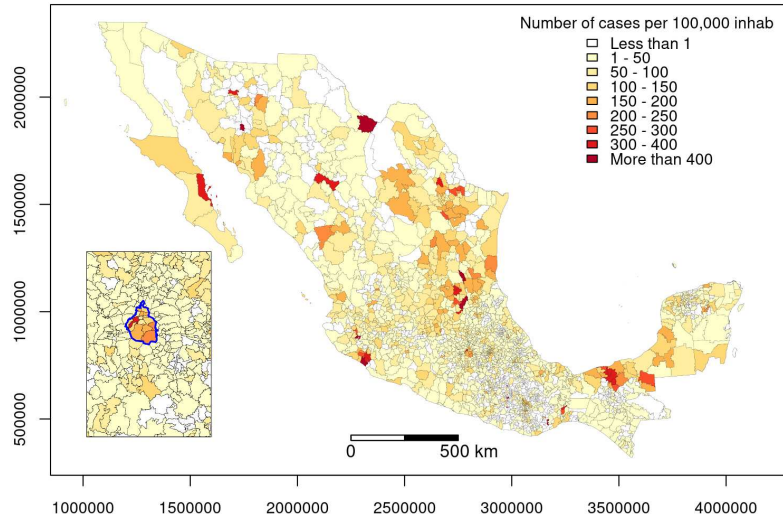

RR week 88 (2021-08-29 to 2021-09-04)

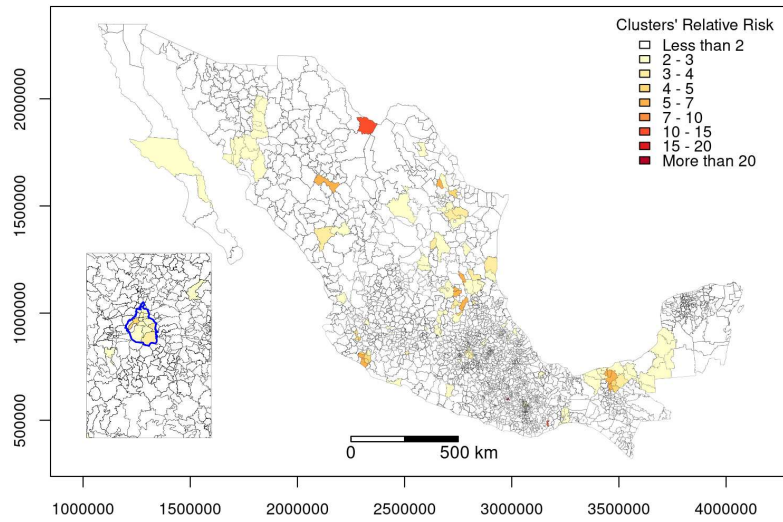

**Cases week 90 (2021-09-12 to 2021-09-18)**

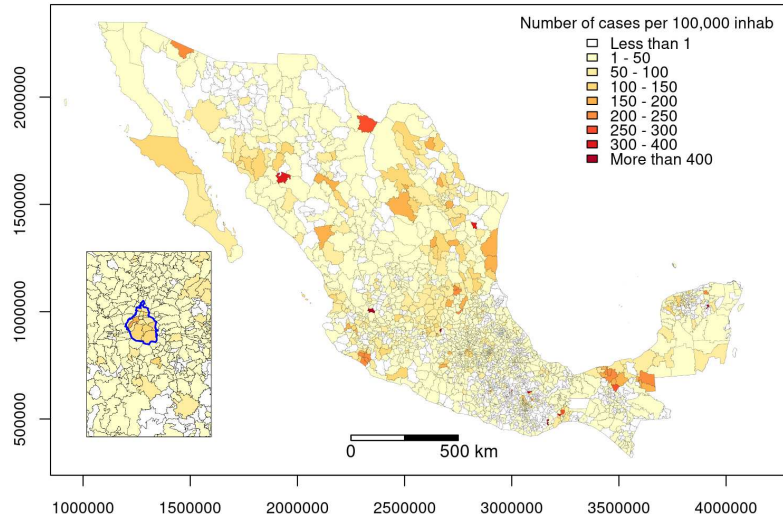

**RR week 90 (2021-09-12 to 2021-09-18)**

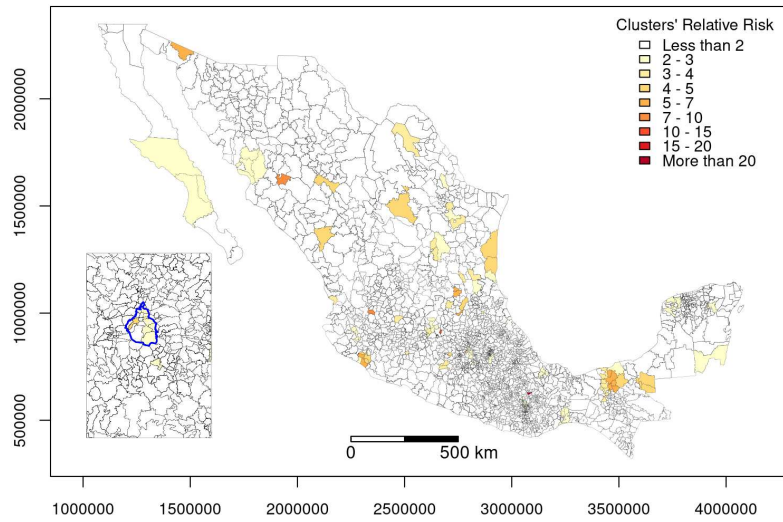

**Cases week 92 (2021-09-26 to 2021-10-02)**

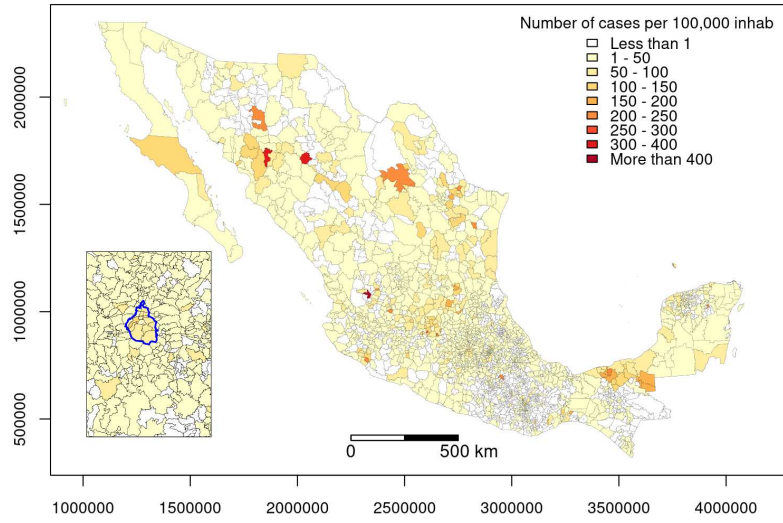

**RR week 92 (2021-09-26 to 2021-10-02)**

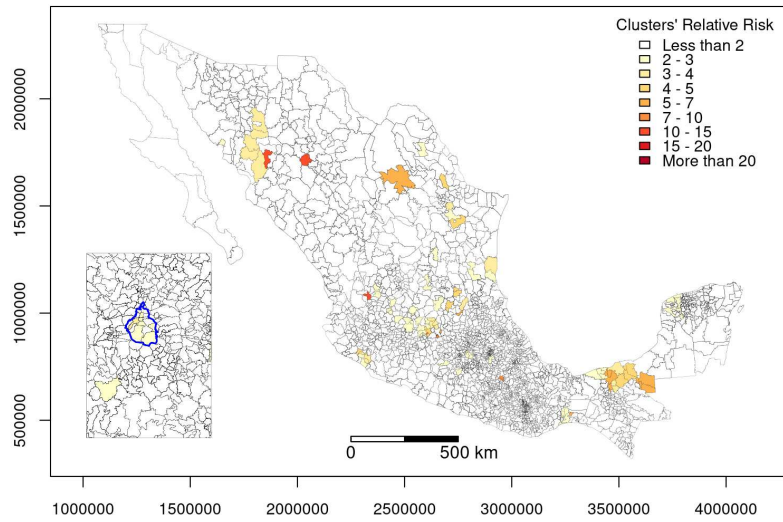

### 3 Effect of the different types of distance on neighbouring relationships

The following figures represent the n nearest neighbours (blue polygons) of Guanajuato's municipality (orange polygon) using Euclidean, least cost, resistance distances and the connectivity obtained by a gravitational model.

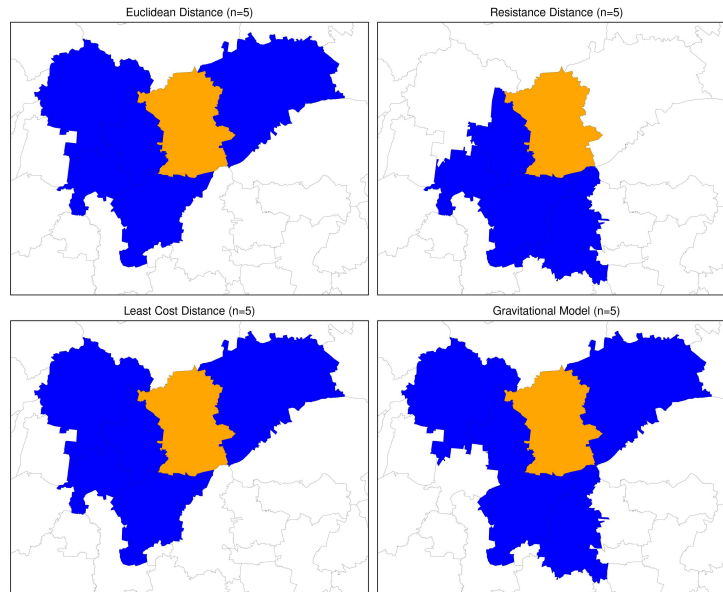

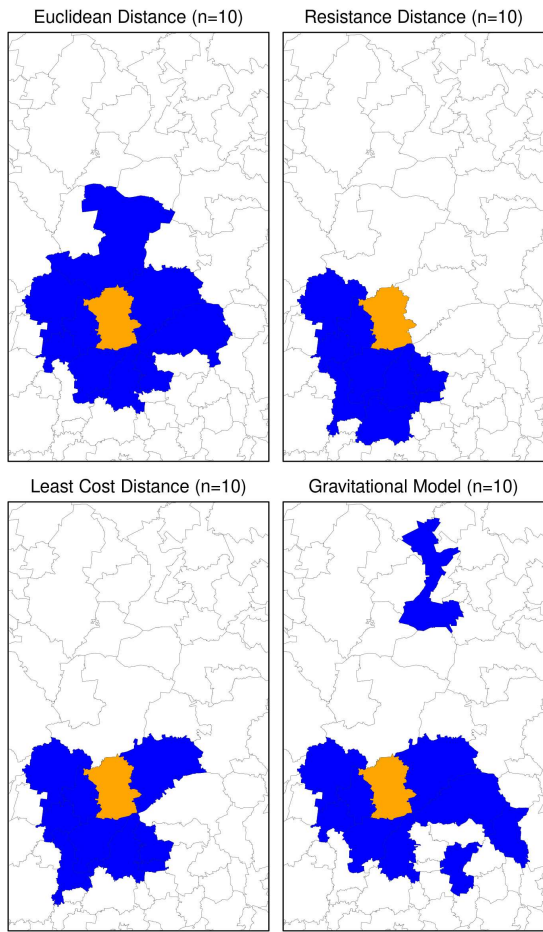

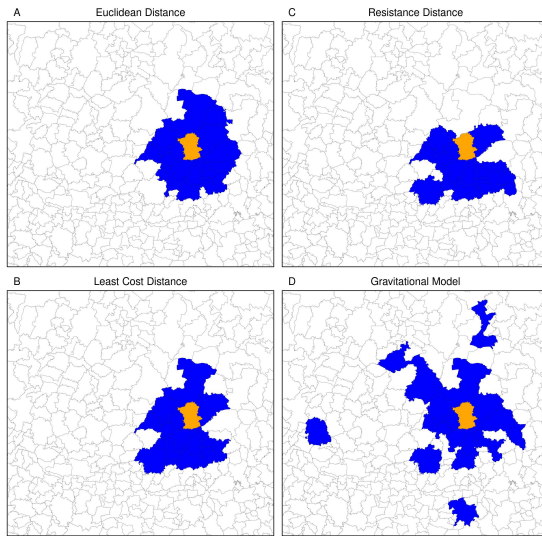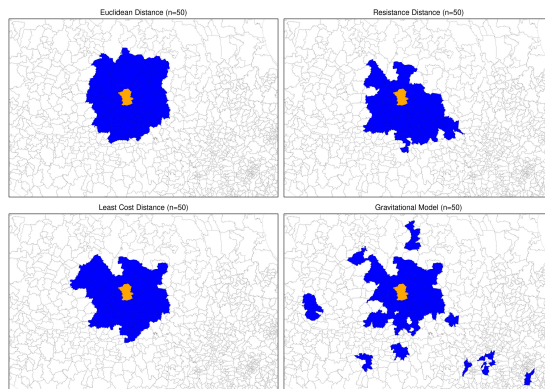



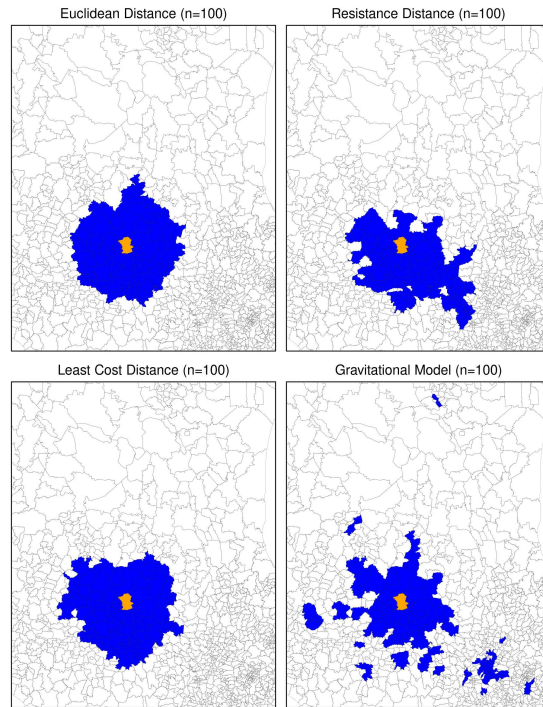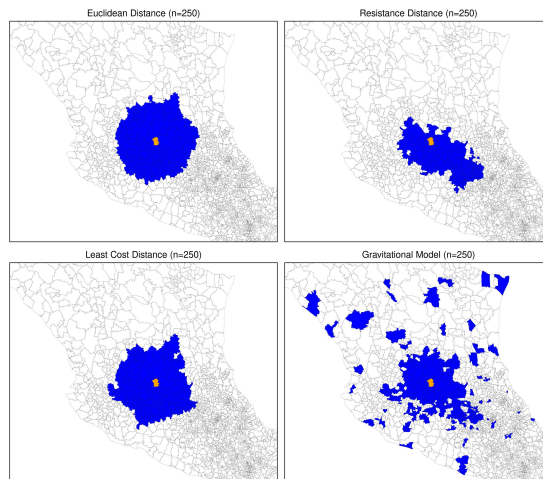

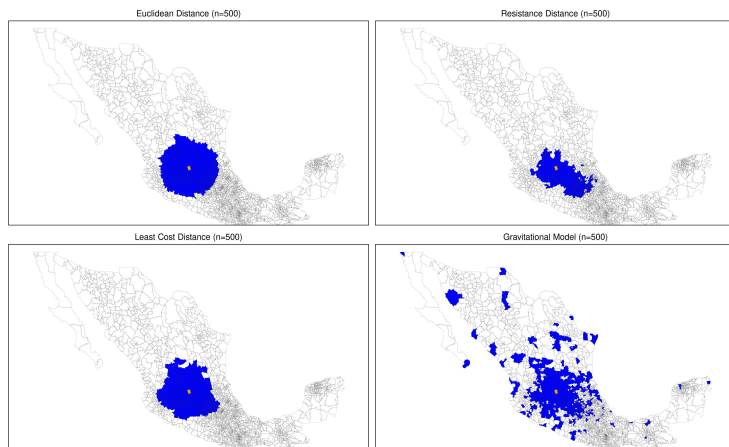

## 4 AUCs obtained by the different types of distance

The mean AUC was computed taking into account a different number of nearest neighbours  $N$  ( $N = 5, 10, 50, 100, 250$  and  $500$ ).

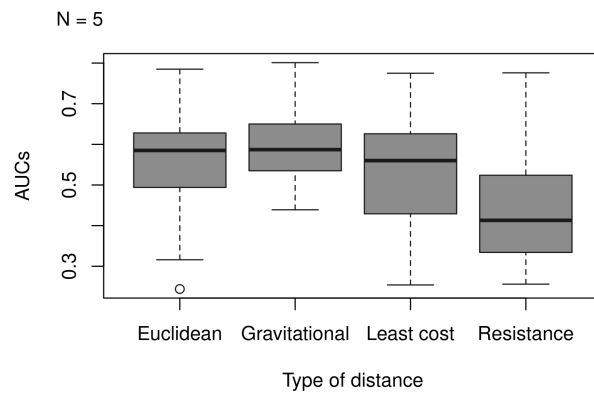

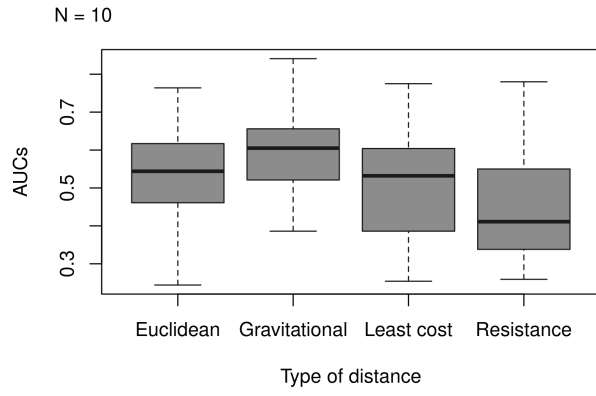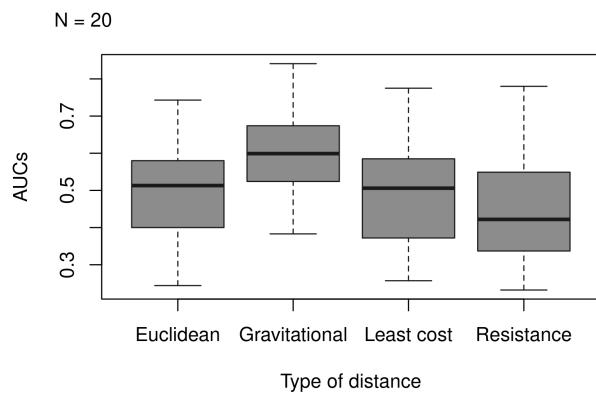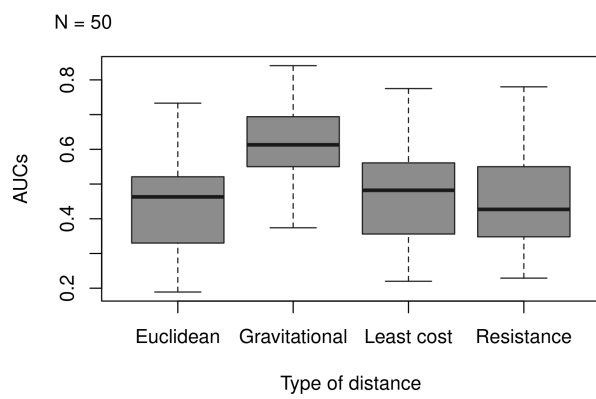

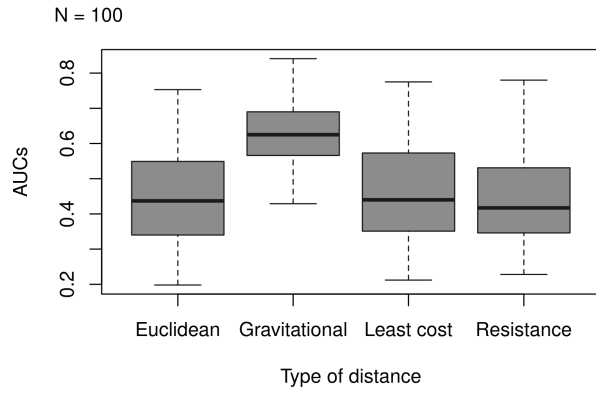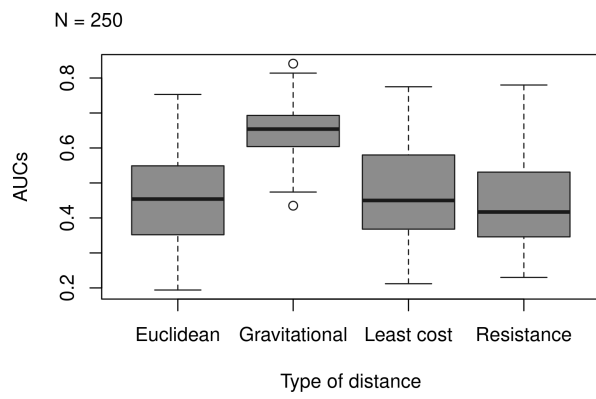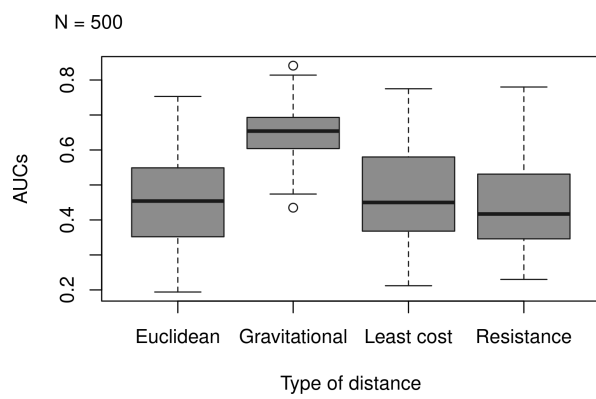

## 5 AUCs obtained by the different types of distance over time

The mean weekly AUC was computed taking into account a different number of nearest neighbours  $N$  ( $N = 5, 10, 20, 50, 100, 250$  and  $500$ ).

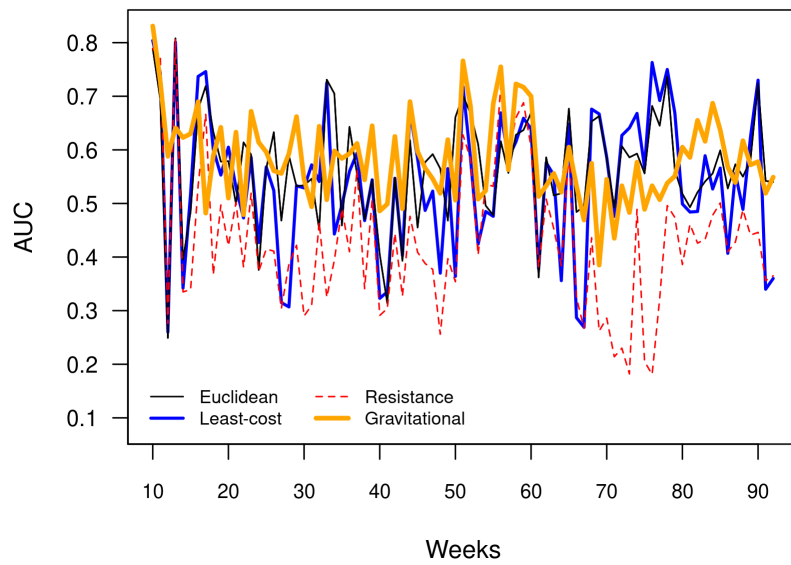



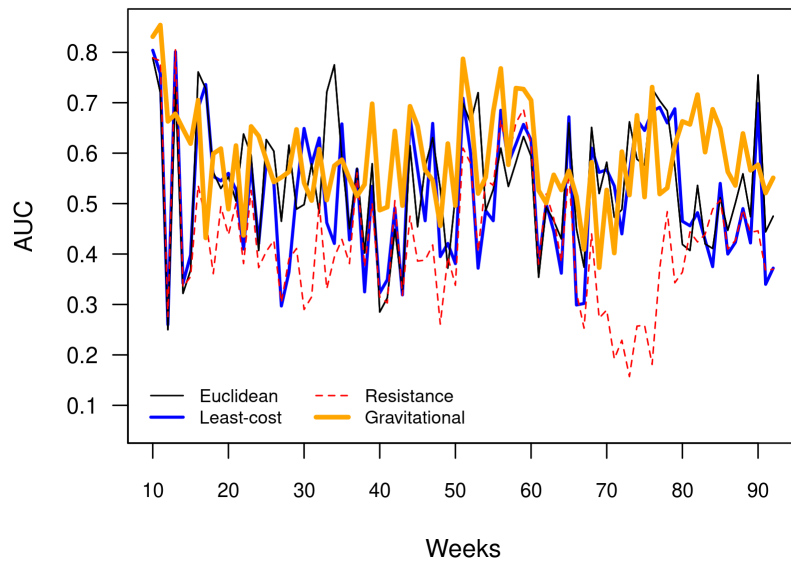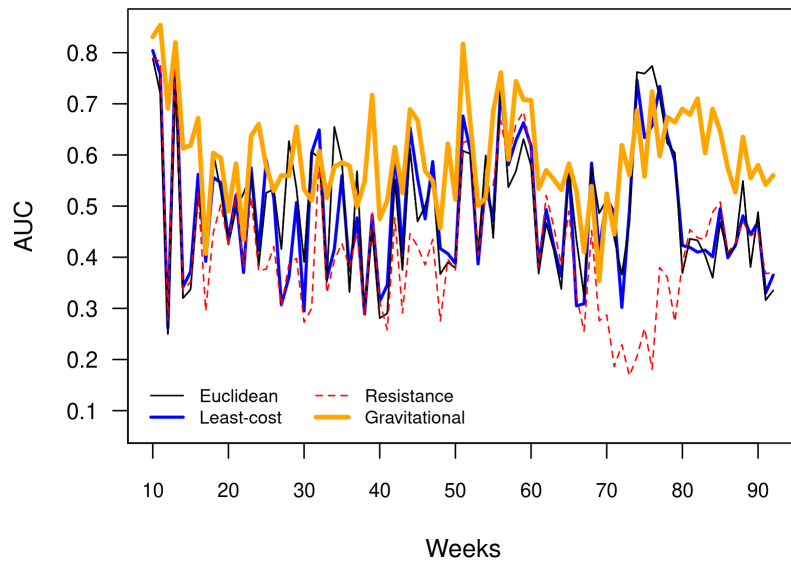

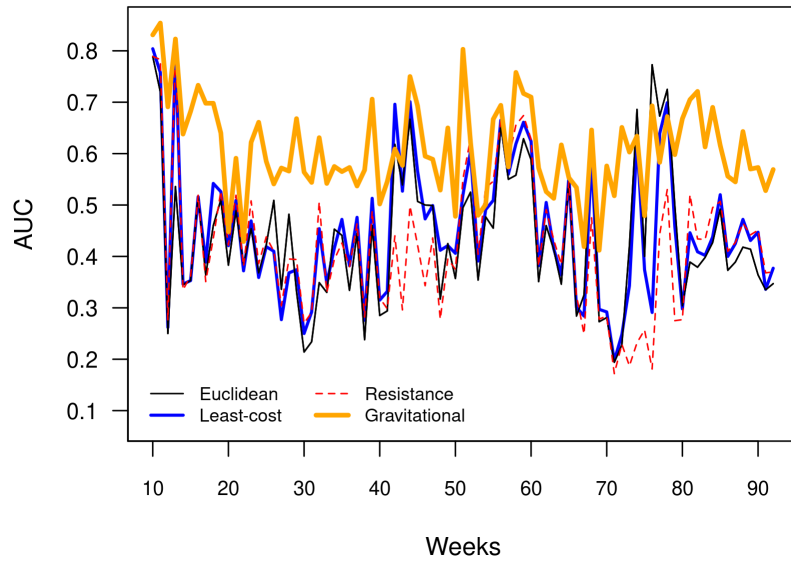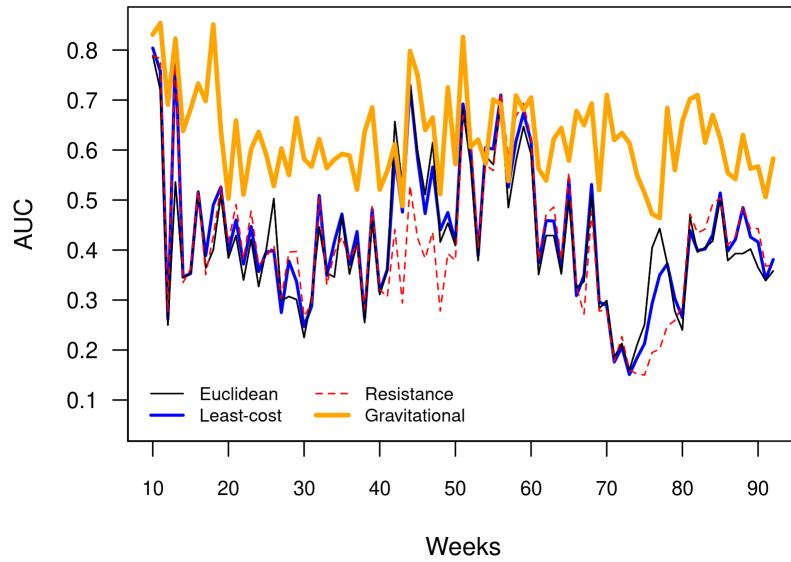

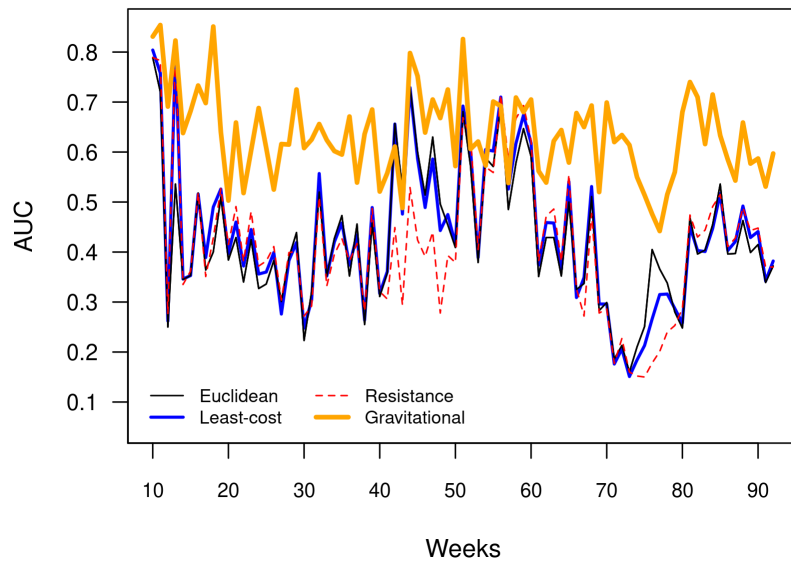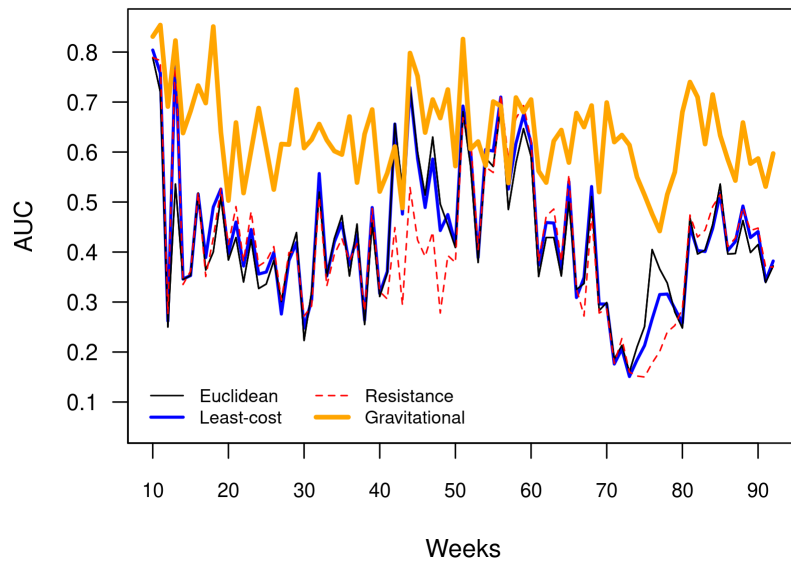

## 6 Equivalence between week number and dates

|    | <b>Week number</b> | <b>From</b> | <b>To</b>  |
|----|--------------------|-------------|------------|
| 1  | 9                  | 2020-02-23  | 2020-02-29 |
| 2  | 10                 | 2020-03-01  | 2020-03-07 |
| 3  | 11                 | 2020-03-08  | 2020-03-14 |
| 4  | 12                 | 2020-03-15  | 2020-03-21 |
| 5  | 13                 | 2020-03-22  | 2020-03-28 |
| 6  | 14                 | 2020-03-29  | 2020-04-04 |
| 7  | 15                 | 2020-04-05  | 2020-04-11 |
| 8  | 16                 | 2020-04-12  | 2020-04-18 |
| 9  | 17                 | 2020-04-19  | 2020-04-25 |
| 10 | 18                 | 2020-04-26  | 2020-05-02 |
| 11 | 19                 | 2020-05-03  | 2020-05-09 |
| 12 | 20                 | 2020-05-10  | 2020-05-16 |
| 13 | 21                 | 2020-05-17  | 2020-05-23 |
| 14 | 22                 | 2020-05-24  | 2020-05-30 |
| 15 | 23                 | 2020-05-31  | 2020-06-06 |
| 16 | 24                 | 2020-06-07  | 2020-06-13 |
| 17 | 25                 | 2020-06-14  | 2020-06-20 |
| 18 | 26                 | 2020-06-21  | 2020-06-27 |
| 19 | 27                 | 2020-06-28  | 2020-07-04 |
| 20 | 28                 | 2020-07-05  | 2020-07-11 |
| 21 | 29                 | 2020-07-12  | 2020-07-18 |
| 22 | 30                 | 2020-07-19  | 2020-07-25 |
| 23 | 31                 | 2020-07-26  | 2020-08-01 |
| 24 | 32                 | 2020-08-02  | 2020-08-08 |
| 25 | 33                 | 2020-08-09  | 2020-08-15 |
| 26 | 34                 | 2020-08-16  | 2020-08-22 |

|    | <b>Week number</b> | <b>From</b> | <b>To</b>  |
|----|--------------------|-------------|------------|
| 27 | 35                 | 2020-08-23  | 2020-08-29 |
| 28 | 36                 | 2020-08-30  | 2020-09-05 |
| 29 | 37                 | 2020-09-06  | 2020-09-12 |
| 30 | 38                 | 2020-09-13  | 2020-09-19 |
| 31 | 39                 | 2020-09-20  | 2020-09-26 |
| 32 | 40                 | 2020-09-27  | 2020-10-03 |
| 33 | 41                 | 2020-10-04  | 2020-10-10 |
| 34 | 42                 | 2020-10-11  | 2020-10-17 |
| 35 | 43                 | 2020-10-18  | 2020-10-24 |
| 36 | 44                 | 2020-10-25  | 2020-10-31 |
| 37 | 45                 | 2020-11-01  | 2020-11-07 |
| 38 | 46                 | 2020-11-08  | 2020-11-14 |
| 39 | 47                 | 2020-11-15  | 2020-11-21 |
| 40 | 48                 | 2020-11-22  | 2020-11-28 |
| 41 | 49                 | 2020-11-29  | 2020-12-05 |
| 42 | 50                 | 2020-12-06  | 2020-12-12 |
| 43 | 51                 | 2020-12-13  | 2020-12-19 |
| 44 | 52                 | 2020-12-20  | 2020-12-26 |
| 45 | 53                 | 2020-12-27  | 2021-01-02 |
| 46 | 54                 | 2021-01-03  | 2021-01-09 |
| 47 | 55                 | 2021-01-10  | 2021-01-16 |
| 48 | 56                 | 2021-01-17  | 2021-01-23 |
| 49 | 57                 | 2021-01-24  | 2021-01-30 |
| 50 | 58                 | 2021-01-31  | 2021-02-06 |
| 51 | 59                 | 2021-02-07  | 2021-02-13 |
| 52 | 60                 | 2021-02-14  | 2021-02-20 |
| 53 | 61                 | 2021-02-21  | 2021-02-27 |
| 54 | 62                 | 2021-02-28  | 2021-03-06 |
| 55 | 63                 | 2021-03-07  | 2021-03-13 |
| 56 | 64                 | 2021-03-14  | 2021-03-20 |
| 57 | 65                 | 2021-03-21  | 2021-03-27 |
| 58 | 66                 | 2021-03-28  | 2021-04-03 |
| 59 | 67                 | 2021-04-04  | 2021-04-10 |
| 60 | 68                 | 2021-04-11  | 2021-04-17 |
| 61 | 69                 | 2021-04-18  | 2021-04-24 |
| 62 | 70                 | 2021-04-25  | 2021-05-01 |

|    | <b>Week number</b> | <b>From</b> | <b>To</b>  |
|----|--------------------|-------------|------------|
| 63 | 71                 | 2021-05-02  | 2021-05-08 |
| 64 | 72                 | 2021-05-09  | 2021-05-15 |
| 65 | 73                 | 2021-05-16  | 2021-05-22 |
| 66 | 74                 | 2021-05-23  | 2021-05-29 |
| 67 | 75                 | 2021-05-30  | 2021-06-05 |
| 68 | 76                 | 2021-06-06  | 2021-06-12 |
| 69 | 77                 | 2021-06-13  | 2021-06-19 |
| 70 | 78                 | 2021-06-20  | 2021-06-26 |
| 71 | 79                 | 2021-06-27  | 2021-07-03 |
| 72 | 80                 | 2021-07-04  | 2021-07-10 |
| 73 | 81                 | 2021-07-11  | 2021-07-17 |
| 74 | 82                 | 2021-07-18  | 2021-07-24 |
| 75 | 83                 | 2021-07-25  | 2021-07-31 |
| 76 | 84                 | 2021-08-01  | 2021-08-07 |
| 77 | 85                 | 2021-08-08  | 2021-08-14 |
| 78 | 86                 | 2021-08-15  | 2021-08-21 |
| 79 | 87                 | 2021-08-22  | 2021-08-28 |
| 80 | 88                 | 2021-08-29  | 2021-09-04 |
| 81 | 89                 | 2021-09-05  | 2021-09-11 |
| 82 | 90                 | 2021-09-12  | 2021-09-18 |
| 83 | 91                 | 2021-09-19  | 2021-09-25 |
| 84 | 92                 | 2021-09-26  | 2021-10-02 |
